# Supplementary material
Source: publisher figshare collection journal article supplement (https://gsapubs.figshare.com/ndownloader/files/22756370)
Supplement: Supplementary file 1 [file 22756370]

## Appendix 1: $^{40}\text{Ar}/^{39}\text{Ar}$ Methods and Data:

Structure and  $^{40}\text{Ar}/^{39}\text{Ar}$  K-feldspar Thermal History of the Gold Butte Block: Re-evaluation of the Tilted Crustal Section Model

*Karlstrom, K.E., Heizler, M., and Quigley, M.C.*

### $^{40}\text{Ar}/^{39}\text{Ar}$ METHODS AND AGE CALCULATIONS

#### Mass spectrometry

All of the samples and standards were analyzed for argon isotopic composition with an MAP-215-50 mass spectrometer equipped with a Johnston electron multiplier. The multiplier is operated at about 2.2 kV and yields a gain above the Faraday collector (10E11 ohm resistor) of about 7000. Typical sensitivity values were 1.0-2.5e-16 mol/pA and 1.0e-16 mol/pA for the furnace and laser systems, respectively. Resolution at 5% peak-height at mass 40 was typically 600. Additional information about the New Mexico Geochronology Research Laboratory can be found within New Bureau of Geology and Mineral Resources open file report OF-AR-1 at <http://geoinfo.nmt.edu/publications/openfile/argon/home.html>.

#### Furnace Step-Heating:

All of the unknowns were step-heated in a double vacuum Mo resistance furnace. Heating times for the K-feldspars were highly variable (10-475 min) and are designed to maximize recovery of the diffusion coefficients and to resolve excess argon contamination by performing several isothermal replicate-heating steps. Heating time for muscovite, biotite and hornblende was 7 minutes for each step. All furnace samples were gettered during heating using a SAES GP-50 getter operated at ~450°C. Following heating, gas was expanded to a second-stage of the extraction line where it was reacted with 2 GP-50 getters (one at 20°C, one at ~450°C) and a W filament operated at about 2000°C. Typical K-feldspar gettering time in the second stage was 2 minutes, whereas

biotite and hornblende were gettered for 5 minutes. The furnace thermocouple was calibrated by melting copper foil and typically the recorded temperature underestimated the sample temperature by 60-100°C. For the K-feldspar data, correction of thermocouple temperature to the Cu foil melting point was done on a sample-by-sample basis and the reported temperature in the data table is calibrated to the foil melting. Estimated accuracy of the heating temperature is  $\pm 15^\circ\text{C}$  for any given step.

Blanks and backgrounds for the K-feldspars were typically determined during a 15-minute, 800°C blank run. For the long and higher temperature heating steps this method under-corrects the true blank and therefore the reported radiogenic yield for these steps contains atmospheric argon that is not solely derived from the samples. Because of the age and high K-content of the K-feldspars, the blank contribution is very minor as reflected by the very high radiogenic yields for all heating steps. Blanks for the micas and hornblende were run before, during and after the step heating and typically yielded values of  $2 \times 10^{-15}$ ,  $1.2 \times 10^{-17}$ ,  $5 \times 10^{-18}$ ,  $4 \times 10^{-18}$ , and  $8 \times 10^{-18}$  moles for masses 40, 39, 38, 37 and 36, respectively.

#### Laser Total Fusion for Fish Canyon flux monitor:

Single sanidine crystals were fused with a Synrad 50 W  $\text{CO}_2$  laser during a 20 second heating with a focused 1.6 W laser. Extracted gas was cleaned for 2 minutes using 2 GP-50 getters (one at 20°C, one at  $\sim 450^\circ\text{C}$ ), a W filament operated at about 2000°C and reaction with a cold finger operated at  $-140^\circ\text{C}$ . Blanks plus backgrounds for were typically:  $1 \times 10^{-16}$ ,  $3 \times 10^{-18}$ ,  $1 \times 10^{-18}$ ,  $4 \times 10^{-18}$ , and  $2 \times 10^{-18}$  moles for masses 40, 39, 38, 37 and 36, respectively.

#### Irradiations, Flux monitoring and age calculations:

Irradiations were performed at both the University of Michigan Ford reactor (position L-67) for either 24 (NM-104) or 100 hours (NM-107). Samples were loaded within an Al disc that was enclosed within an evacuated quartz vessel.

Fluence gradients were monitored with Fish Canyon (FC-2) sanidine. Typically fusing 4 crystals from each location monitored 4 to 6 locations within individual sample

trays. A sine curve was fit to the mean value of each location and J-factors were determined for the unknowns based on their geometry and the calculated curve. J-factor errors are estimated at 0.1 to 0.2% ( $1\sigma$ ). Correction factors for interfering reactions were measured with K-glass and  $\text{CaF}_2$ . Typically 4 to 5 grains of each were fused with the  $\text{CO}_2$  laser to obtain a weighted mean value for each correction factor.

Reported ages for step-heated samples are weighed by the inverse variance for the indicated steps. MSWD values are calculated for each weighted mean and errors are determined using the method of Taylor (1982). If the MSWD value is greater than 1, the error is multiplied by the square root of the MSWD. No strict plateau criteria were adhered to; rather weighted means were calculated for the flattest parts of each age spectrum. Total gas ages were determined by summing all of the isotopes for all steps and errors were calculated by quadratically summing individual errors from each heating step.

Monitor age and decay constants:

The assigned age of Fish Canyon sanidine is 27.84 Ma and the total  $^{40}\text{K}$  decay constant is  $5.543\text{e-}10/\text{a}$ . This value is relative to MMhb-1 hornblende at 520.4 Ma (Samson and Alexander, 1987; Deino and Potts, 1990).

#### References Cited:

- Deino, A., and Potts, R., 1990. Single-Crystal  $^{40}\text{Ar}/^{39}\text{Ar}$  dating of the Olorgesailie Formation, Southern Kenya Rift, *J. Geophys. Res.*, 95, 8453-8470.
- Samson, S.D., and E.C. Alexander, Jr., 1987, Calibration of the interlaboratory  $^{40}\text{Ar}/^{39}\text{Ar}$  dating standard, Mmhb-1, *Chem. Geol. Isot. Geosci.*, 66, 27-34.
- Steiger, R.H. and Jager, E., 1977. Subcommittee on geochronology: Convention on the use of decay constants in geo- and cosmochemistry. *Earth and Planet. Sci. Lett.*, 36: 359-362.
- Taylor, J.R., 1982, *An Introduction to Error Analysis: The Study of Uncertainties in Physical Measurements*, Univ. Sci. Books, Mill Valley, Calif., 270 p.

K-feldspar argon data are presented in the context of the MDD model that is fully described in Appendix II. Each K-feldspar result is shown in a 4 panel plot as follows: a) measured spectrum (green) and model spectra (red); b) measured (black) and model (red) Arrhenius diagram with  $D/r^2$  values determined using a slab geometry, c)  $\log r/r_0$  diagram with measured data presented in black and model data in red, and d) thermal histories that provided the model spectra when the thermal history is imposed upon the model kinetic parameters. In the thermal histories, the red and yellow bands represent the distribution of at least 20 models that assume only cooling from an initially high temperature where as the black lines represent thermal histories that allow for reheating. Because the reheating models significantly visually obscure the cooling only models for KGB99-32a, we have added a 5<sup>th</sup> panel (e) for the this sample that separates the two thermal history scenarios. In the body of the manuscript we focus on samples KGB99-1, KGB99-27 and KGB99-32a and add into our models understanding of the geological information such as position relative to the Great Unconformity and relative structural position between samples. Because the models presented below are intended to be given with as few assumptions as possible they are not all necessarily consistent with geological relationships, but do represent the least biased view of the thermal history calculations.

In addition to the argon presentation in figure form, a complete table of isotopic data is also provided.

Information on samples dated by the  $^{40}\text{Ar}/^{39}\text{Ar}$  method

| Sample    |  | Description                | Location                                      | Minerals dated              |
|-----------|--|----------------------------|-----------------------------------------------|-----------------------------|
| KGB99-1   |  | Leuco-granite              | Just beneath Tapeats at Azure Ridge           | K-spar                      |
| KGB99-16  |  | Paleoproterozoic granitoid | Pig's Ear                                     | Hornblende, biotite, K-spar |
| KGB99-25  |  | Pegmatite                  | Central-west side of block in ultramafic area | Muscovite                   |
| KGB99-27  |  | Gold Butte Granite         | E side of Garrett Butte                       | Biotite, K-spar             |
| KGB99-32a |  | Laramide pluton            | West-side of block                            | Muscovite, biotite, K-spar  |
| KGB99-34  |  | Gold Butte Granite         | West edge of pluton                           | Hornblende, biotite, K-spar |

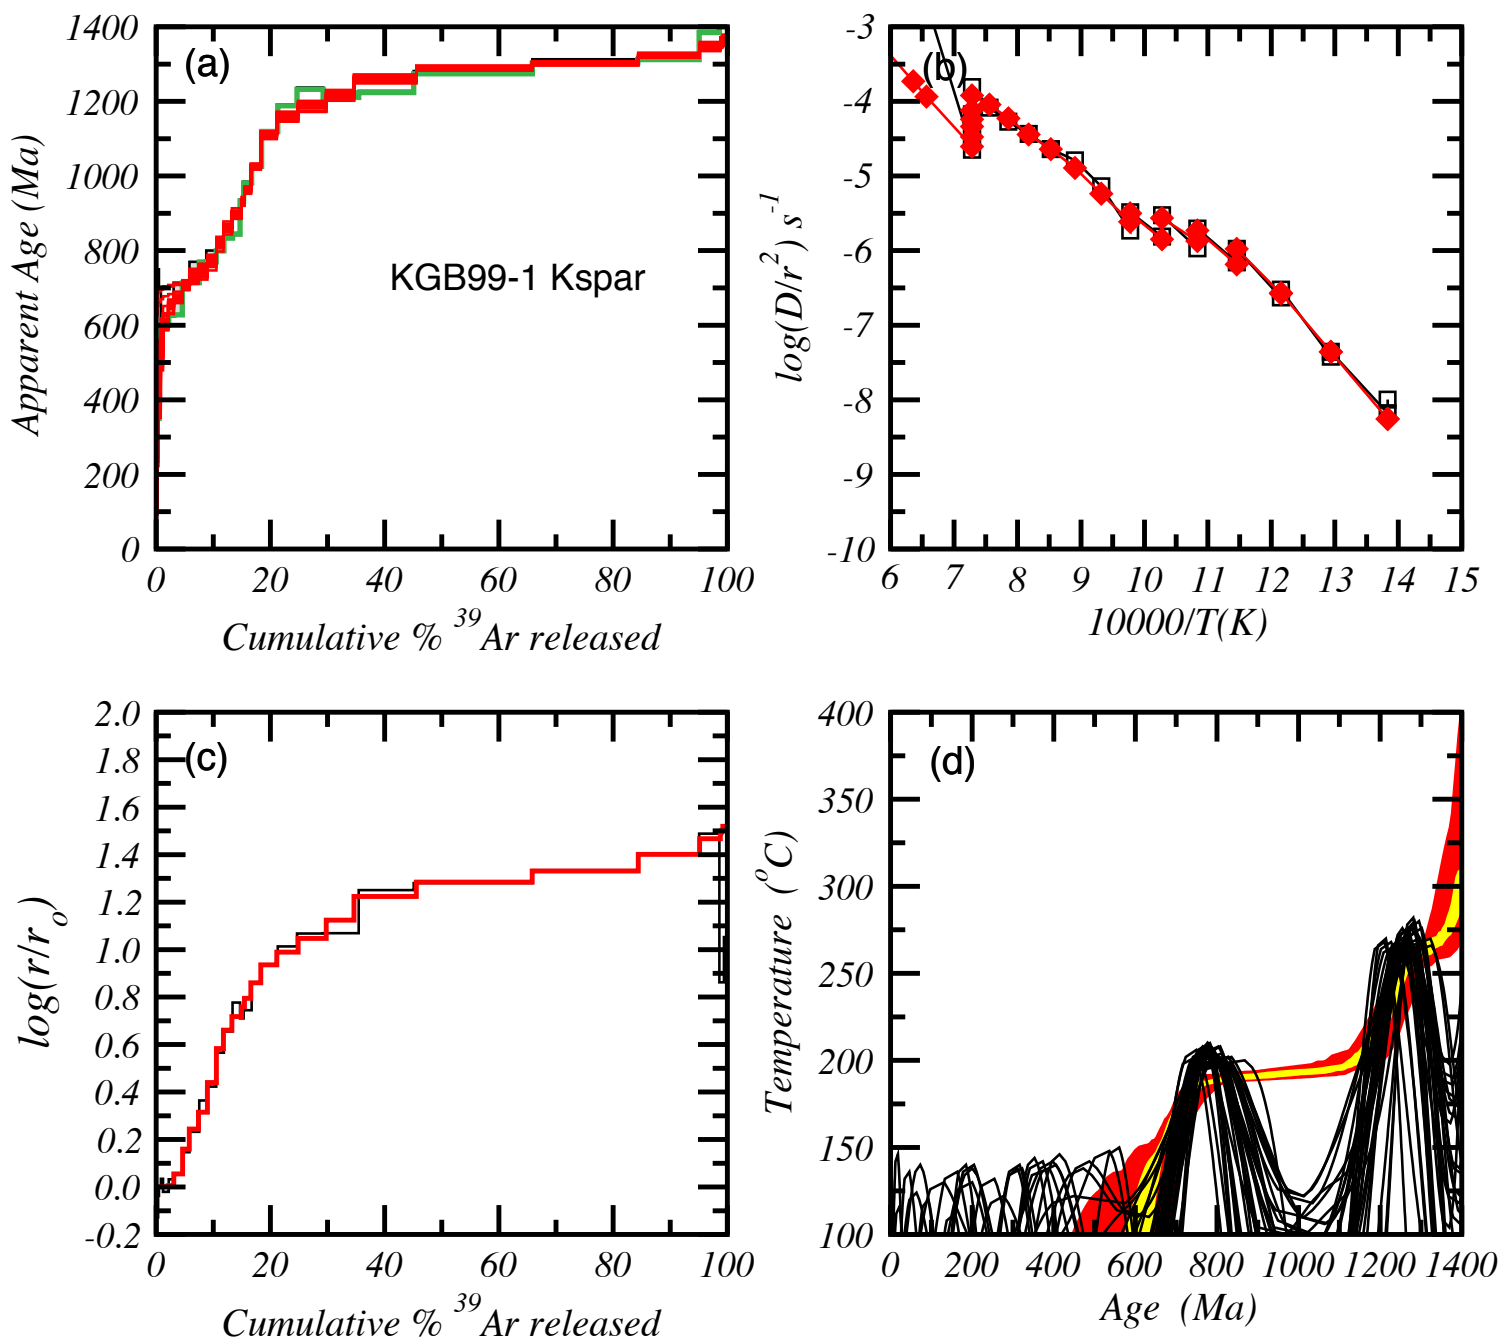

Fig. DR1. K- feldspar from KGB99-1, just beneath Tapeats Sandstone near Azure Ridge. a) measured spectrum (green) and model spectra (red); b) measured (black) and model (red) Arrhenius diagram with  $D/r^2$  values determined using a slab geometry, c)  $\log r/r_0$  diagram with measured data presented in black and model data in red, and d) thermal histories that provided the model spectra when the thermal history is imposed upon the model kinetic parameters; the red and yellow bands represent the distribution of at least 20 models that assume only cooling from an initially high temperature where as the black lines represent thermal histories that allow for reheating.

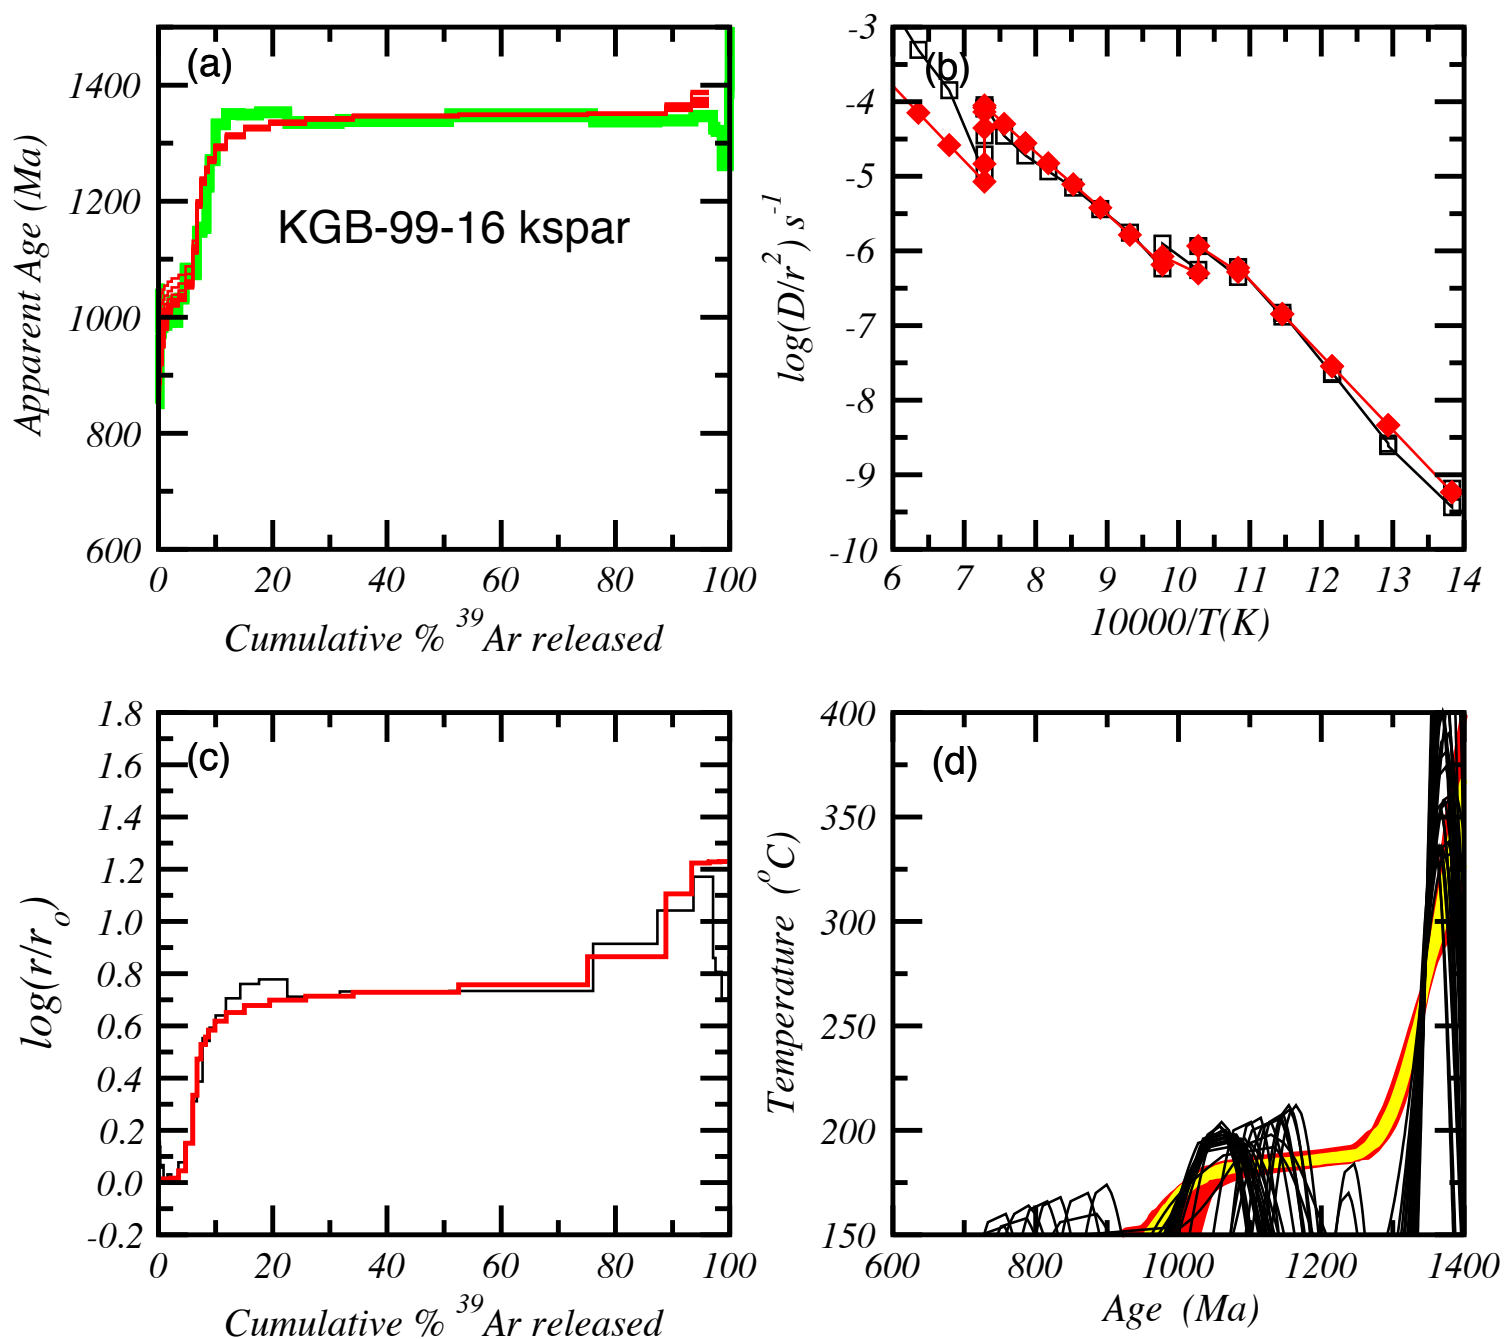

Fig. DR2. K- feldspar from KGB99-16, Paleoproterozoic granite from basement window north of Gold Butte fault. a) measured spectrum (green) and model spectra (red); b) measured (black) and model (red) Arrhenius diagram with  $D/r^2$  values determined using a slab geometry, c)  $\log r/r_0$  diagram with measured data presented in black and model data in red, and d) thermal histories that provided the model spectra when the thermal history is imposed upon the model kinetic parameters; the red and yellow bands represent the distribution of at least 20 models that assume only cooling from an initially high temperature where as the black lines represent thermal histories that allow for reheating.

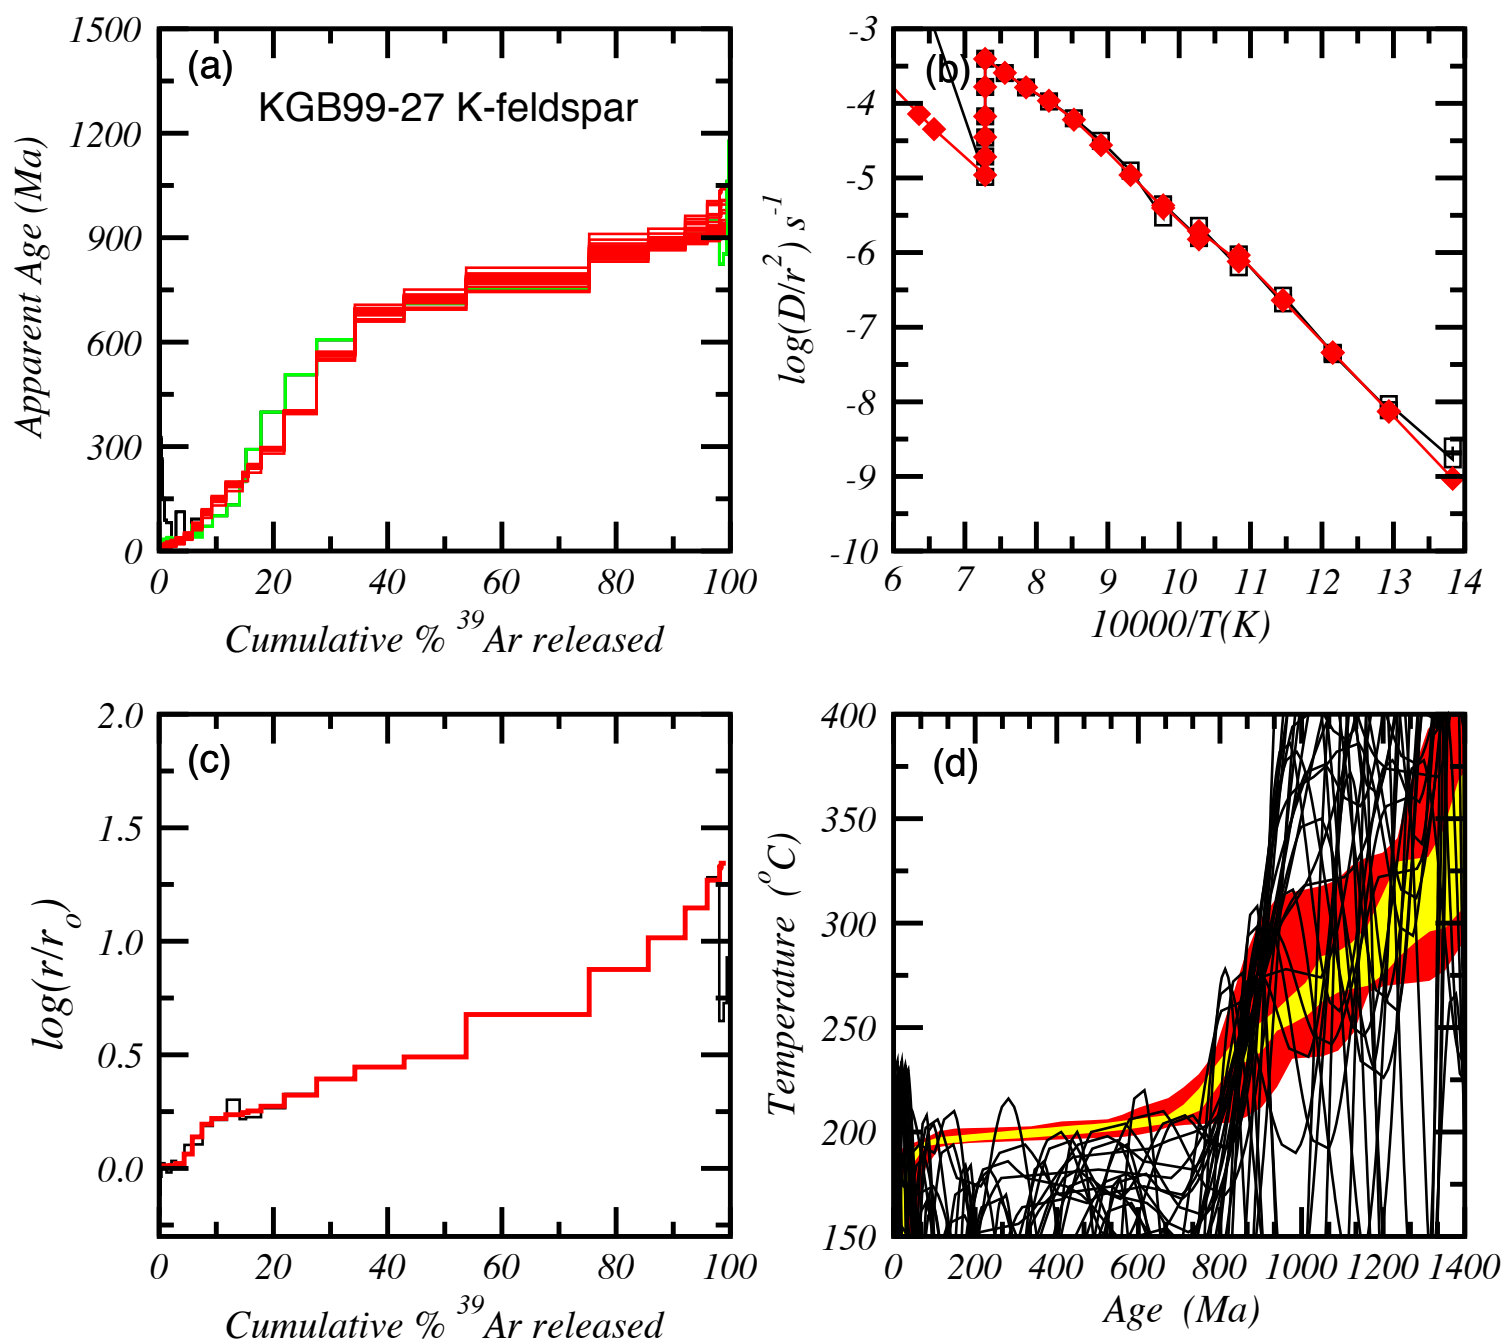

Fig. DR3. K- feldspar from KGB99-27, Gold Butte granite on east side of Garrett Butte. a) measured spectrum (green) and model spectra (red); b) measured (black) and model (red) Arrhenius diagram with  $D/r^2$  values determined using a slab geometry, c)  $\log(r/r_0)$  diagram with measured data presented in black and model data in red, and d) thermal histories that provided the model spectra when the thermal history is imposed upon the model kinetic parameters; the red and yellow bands represent the distribution of at least 20 models that assume only cooling from an initially high temperature where as the black lines represent thermal histories that allow for reheating.



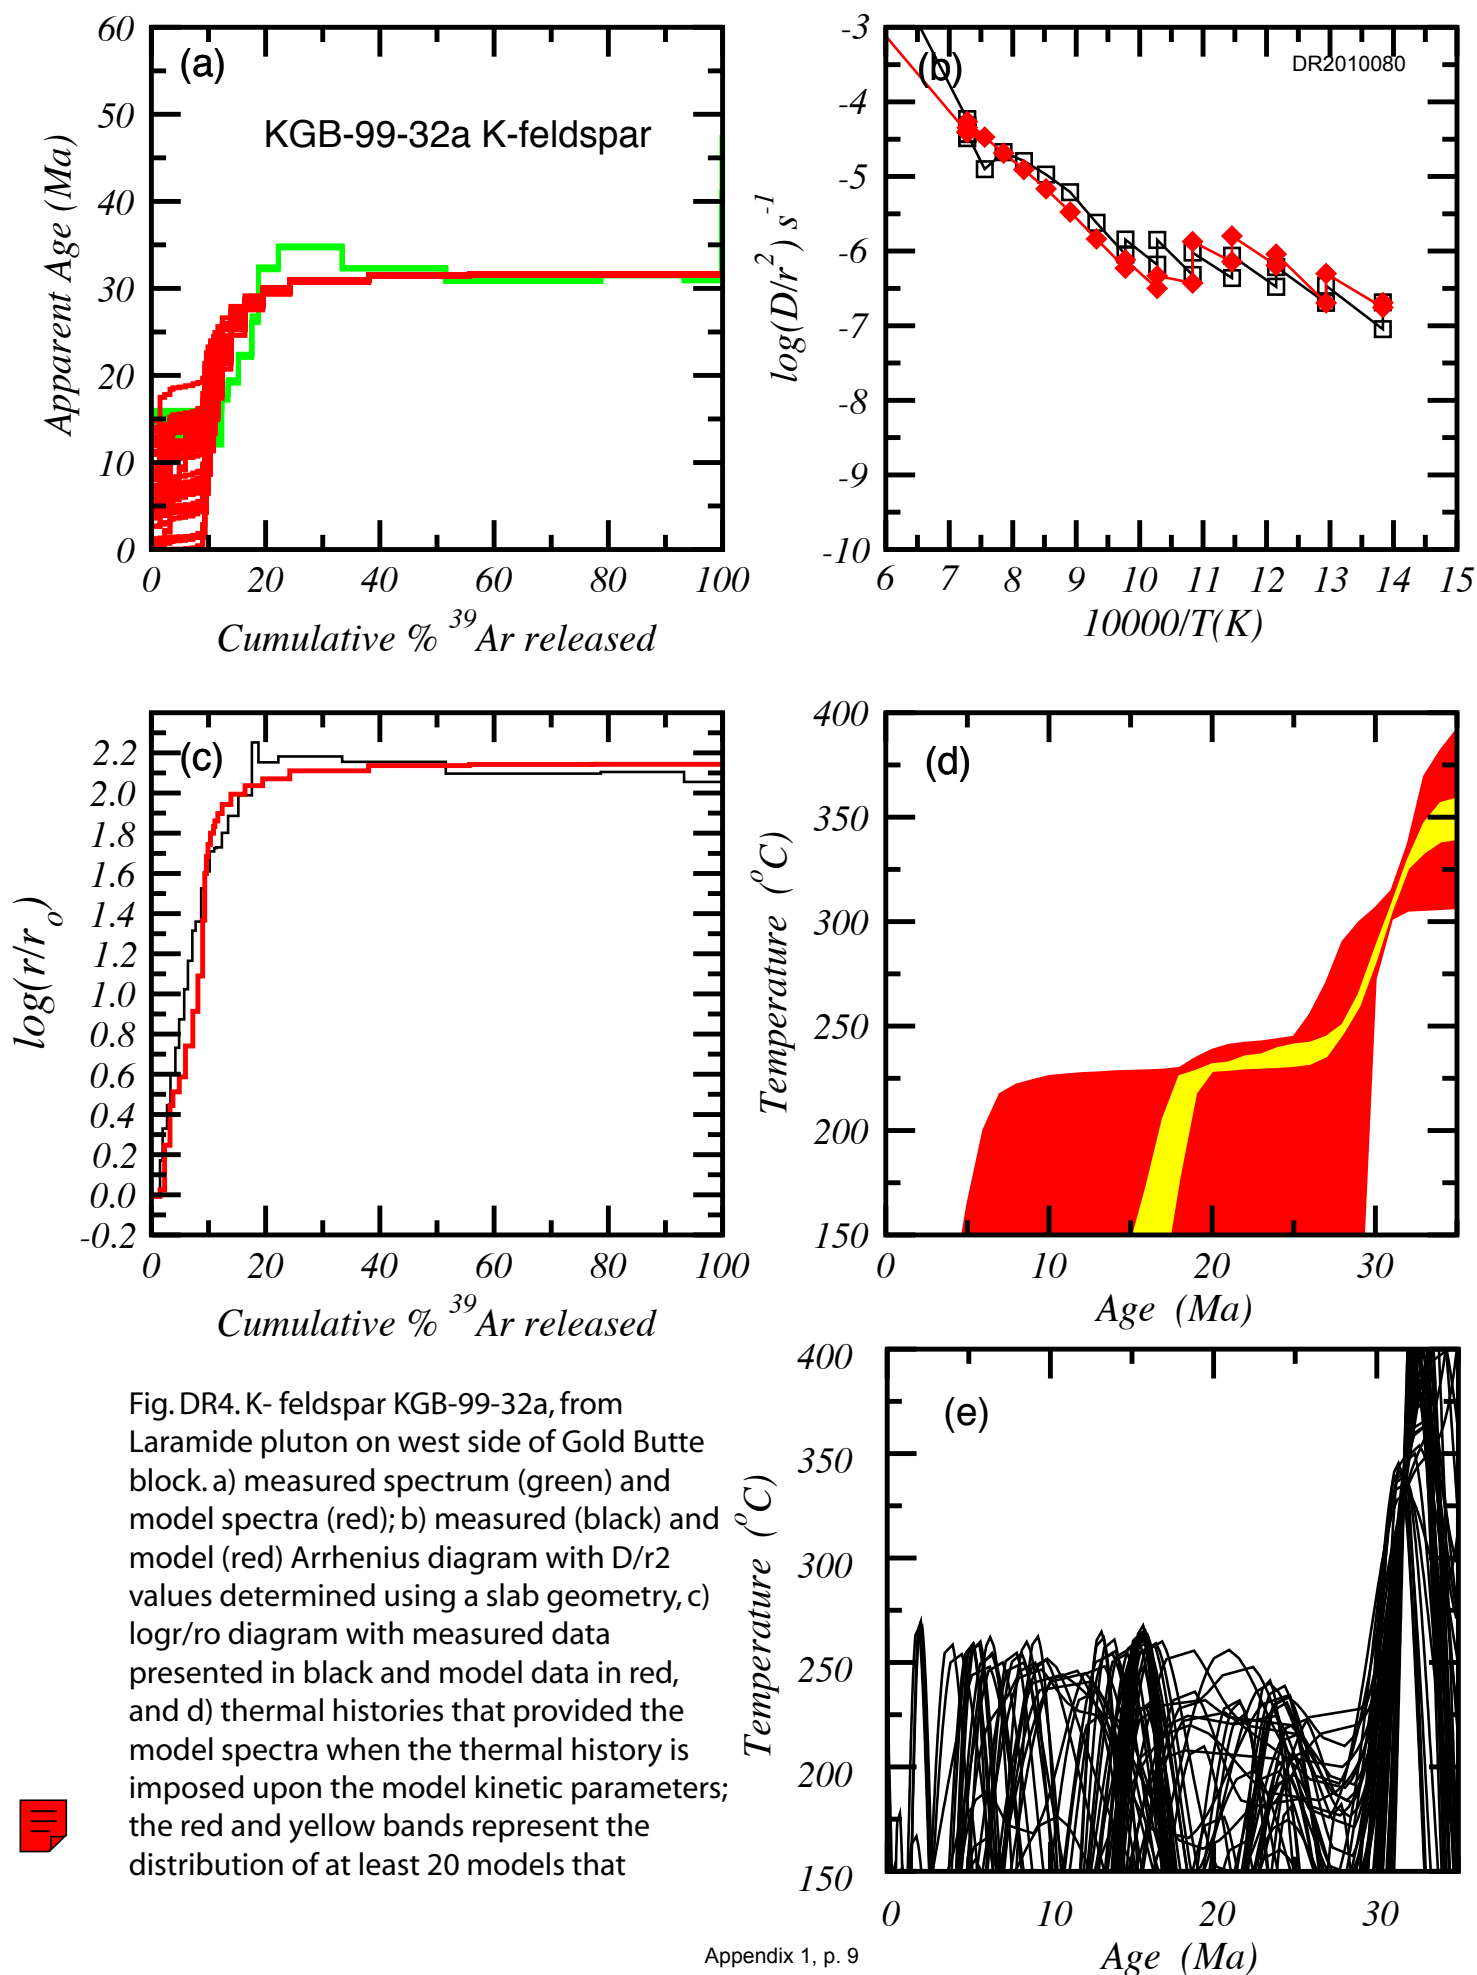

Fig. DR4. K- feldspar KGB-99-32a, from Laramide pluton on west side of Gold Butte block. a) measured spectrum (green) and model spectra (red); b) measured (black) and model (red) Arrhenius diagram with  $D/r^2$  values determined using a slab geometry, c)  $\log(r/r_0)$  diagram with measured data presented in black and model data in red, and d) thermal histories that provided the model spectra when the thermal history is imposed upon the model kinetic parameters; the red and yellow bands represent the distribution of at least 20 models that

| ID                                                                                               | Temp | <sup>40</sup> Ar/ <sup>39</sup> Ar | <sup>37</sup> Ar/ <sup>39</sup> Ar | <sup>36</sup> Ar/ <sup>39</sup> Ar | <sup>39</sup> Ar <sub>K</sub> | K/Ca | <sup>40</sup> Ar* | <sup>39</sup> Ar | Age    | ±1σ  | Time  |
|--------------------------------------------------------------------------------------------------|------|------------------------------------|------------------------------------|------------------------------------|-------------------------------|------|-------------------|------------------|--------|------|-------|
|                                                                                                  | (°C) |                                    |                                    | (x 10 <sup>-3</sup> )              | (x 10 <sup>-15</sup> mol)     |      | (%)               | (%)              | (Ma)   | (Ma) | (min) |
| KGB-99-1 C:2:107, K-feldspar, 1.64 mg, J=0.0161952±0.10%, D=1.0024±0.001, NM-107, Lab#=50303-01  |      |                                    |                                    |                                    |                               |      |                   |                  |        |      |       |
| x A                                                                                              | 450  | 323.0                              | 0.0184                             | 36.58                              | 3.12                          | 27.7 | 96.7              | 0.3              | 3249   | 5    | 14.3  |
| x B                                                                                              | 450  | 36.96                              | 0.0083                             | 6.670                              | 1.428                         | 61.7 | 94.7              | 0.5              | 809.5  | 5.6  | 24.5  |
| x C                                                                                              | 500  | 36.60                              | 0.0100                             | 3.942                              | 3.37                          | 51.0 | 96.8              | 0.8              | 817.7  | 2.6  | 14.1  |
| x D                                                                                              | 500  | 25.16                              | 0.0158                             | 2.809                              | 3.24                          | 32.3 | 96.7              | 1.2              | 598.7  | 2.9  | 24.2  |
| x E                                                                                              | 550  | 34.52                              | 0.0109                             | 1.429                              | 9.47                          | 46.7 | 98.8              | 2.2              | 792.8  | 1.5  | 14.8  |
| x F                                                                                              | 550  | 25.98                              | 0.0076                             | 1.012                              | 8.02                          | 67.2 | 98.9              | 3.0              | 626.8  | 1.4  | 24.8  |
| x G                                                                                              | 600  | 35.83                              | 0.0070                             | 1.003                              | 14.50                         | 72.4 | 99.2              | 4.6              | 819.6  | 1.4  | 14.6  |
| x H                                                                                              | 600  | 30.14                              | 0.0071                             | 0.6254                             | 11.84                         | 71.9 | 99.4              | 5.8              | 713.0  | 1.1  | 24.7  |
| x I                                                                                              | 650  | 35.08                              | 0.0084                             | 0.9273                             | 15.89                         | 60.4 | 99.2              | 7.5              | 806.0  | 1.3  | 15.0  |
| x J                                                                                              | 650  | 33.00                              | 0.0110                             | 0.4976                             | 11.81                         | 46.3 | 99.6              | 8.8              | 769.1  | 1.1  | 25.0  |
| x K                                                                                              | 700  | 36.42                              | 0.0140                             | 0.8883                             | 16.40                         | 36.3 | 99.3              | 10.5             | 831.1  | 1.2  | 14.8  |
| x L                                                                                              | 700  | 34.55                              | 0.0158                             | 0.3688                             | 12.43                         | 32.4 | 99.7              | 11.8             | 799.1  | 1.3  | 25.1  |
| x M                                                                                              | 750  | 36.45                              | 0.0189                             | 0.6166                             | 14.43                         | 26.9 | 99.5              | 13.4             | 833.2  | 1.2  | 15.5  |
| x N                                                                                              | 750  | 37.05                              | 0.0228                             | 0.6210                             | 12.16                         | 22.3 | 99.5              | 14.7             | 844.1  | 1.4  | 25.5  |
| x O                                                                                              | 800  | 42.06                              | 0.0299                             | 0.6404                             | 6.09                          | 17.1 | 99.6              | 15.3             | 933.5  | 1.8  | 3.5   |
| x P                                                                                              | 850  | 45.27                              | 0.0404                             | 2.117                              | 13.11                         | 12.6 | 98.6              | 16.7             | 981.2  | 1.5  | 3.6   |
| x Q                                                                                              | 900  | 47.63                              | 0.0548                             | 1.095                              | 16.44                         | 9.3  | 99.3              | 18.5             | 1025.8 | 1.6  | 3.5   |
| x R                                                                                              | 950  | 53.32                              | 0.0530                             | 0.7968                             | 26.6                          | 9.6  | 99.6              | 21.3             | 1119.0 | 1.4  | 4.0   |
| x S                                                                                              | 1000 | 57.76                              | 0.0278                             | 0.6292                             | 31.7                          | 18.4 | 99.7              | 24.7             | 1188.1 | 1.6  | 3.8   |
| x T                                                                                              | 1050 | 60.76                              | 0.0149                             | 0.6586                             | 43.0                          | 34.1 | 99.7              | 29.2             | 1232.8 | 2.1  | 3.9   |
| x U                                                                                              | 1100 | 59.31                              | 0.0145                             | 0.6728                             | 58.7                          | 35.2 | 99.7              | 35.5             | 1211.2 | 2.4  | 3.4   |
| x V                                                                                              | 1100 | 60.14                              | 0.0142                             | 0.6398                             | 90.6                          | 35.8 | 99.7              | 45.1             | 1223.7 | 2.0  | 15.1  |
| x W                                                                                              | 1100 | 63.68                              | 0.0208                             | 0.6010                             | 195.7                         | 24.5 | 99.7              | 65.9             | 1275.6 | 3.6  | 54.3  |
| x X                                                                                              | 1100 | 65.81                              | 0.0204                             | 0.6434                             | 173.6                         | 25.1 | 99.7              | 84.3             | 1305.9 | 4.7  | 114.8 |
| x Y                                                                                              | 1100 | 66.41                              | 0.0198                             | 0.9581                             | 101.2                         | 25.8 | 99.6              | 95.1             | 1313.0 | 3.2  | 235.9 |
| x Z                                                                                              | 1100 | 71.93                              | 0.0107                             | 2.274                              | 33.3                          | 47.6 | 99.1              | 98.6             | 1384.0 | 1.5  | 377.6 |
| x ZA                                                                                             | 1250 | 75.19                              | 0.0097                             | 0.6118                             | 7.55                          | 52.5 | 99.8              | 99.4             | 1434.1 | 2.2  | 2.7   |
| x ZB                                                                                             | 1300 | 74.42                              | 0.0377                             | 1.068                              | 3.19                          | 13.5 | 99.6              | 99.7             | 1422.2 | 3.3  | 3.9   |
| x ZC                                                                                             | 1400 | 79.52                              | 0.0247                             | 3.938                              | 2.42                          | 20.6 | 98.5              | 100.0            | 1477.9 | 4.8  | 4.3   |
| x ZE                                                                                             | 1700 | 687.9                              | 1.025                              | 2272.4                             | 0.074                         | 0.50 | 2.4               | 100.0            | 426    | 99   | 2.4   |
| Integrated age ± 1σ                                                                              |      |                                    | n=30                               |                                    | 941.3                         |      | K2O=13.61%        |                  | 1213.5 | 1.7  |       |
| Plateau ± 1σ no plateau                                                                          |      |                                    |                                    |                                    |                               |      |                   |                  |        |      |       |
| KGB-99-16 D:1:107, Hornblende, 3.50 mg, J=0.0162518±0.10%, D=1.0024±0.001, NM-107, Lab#=50310-01 |      |                                    |                                    |                                    |                               |      |                   |                  |        |      |       |
| x A                                                                                              | 800  | 23.00                              | 0.7296                             | 46.25                              | 2.31                          | 0.70 | 40.9              | 2.8              | 256.5  | 6.6  |       |
| x B                                                                                              | 900  | 79.33                              | 0.4128                             | 26.79                              | 0.905                         | 1.2  | 90.1              | 3.9              | 1390.4 | 9.5  |       |
| x C                                                                                              | 950  | 74.40                              | 0.4450                             | 6.090                              | 0.486                         | 1.1  | 97.6              | 4.5              | 1406.5 | 16.7 |       |
| x D                                                                                              | 1000 | 87.34                              | 1.922                              | 9.994                              | 1.576                         | 0.27 | 96.8              | 6.4              | 1561.2 | 6.0  |       |
| x E                                                                                              | 1050 | 87.62                              | 2.212                              | 5.044                              | 2.93                          | 0.23 | 98.5              | 9.9              | 1583.1 | 4.5  |       |
| x F                                                                                              | 1080 | 87.59                              | 2.741                              | 2.942                              | 4.88                          | 0.19 | 99.3              | 15.8             | 1591.3 | 3.0  |       |
| x G                                                                                              | 1100 | 87.12                              | 2.843                              | 2.329                              | 5.09                          | 0.18 | 99.5              | 22.0             | 1588.0 | 2.8  |       |
| x H                                                                                              | 1120 | 87.34                              | 2.874                              | 0.7737                             | 5.76                          | 0.18 | 100.0             | 29.0             | 1596.2 | 2.8  |       |
| x I                                                                                              | 1140 | 88.72                              | 3.135                              | 1.164                              | 22.7                          | 0.16 | 99.9              | 56.4             | 1612.0 | 1.8  |       |
| x J                                                                                              | 1160 | 87.02                              | 2.654                              | 5.284                              | 4.75                          | 0.19 | 98.5              | 62.2             | 1575.7 | 3.2  |       |
| x K                                                                                              | 1180 | 87.10                              | 2.673                              | 6.497                              | 3.38                          | 0.19 | 98.1              | 66.3             | 1572.3 | 4.1  |       |
| x L                                                                                              | 1220 | 88.72                              | 3.588                              | 0.8974                             | 22.3                          | 0.14 | 100.1             | 93.3             | 1613.7 | 2.1  |       |
| x M                                                                                              | 1300 | 88.84                              | 3.428                              | 5.683                              | 4.45                          | 0.15 | 98.5              | 98.7             | 1597.8 | 3.2  |       |
| x N                                                                                              | 1650 | 122.8                              | 3.033                              | 123.2                              | 1.070                         | 0.17 | 70.6              | 100.0            | 1588   | 12   |       |
| Integrated age ± 1σ                                                                              |      |                                    | n=14                               |                                    | 82.6                          | 0.17 | K2O=0.56%         |                  | 1571.2 | 1.7  |       |
| Plateau ± 1σ                                                                                     |      |                                    | steps I-L                          | n=2                                | MSWD=0.41                     | 45.0 |                   | 54.5             | 1612.7 | 1.7  |       |

| ID                                                                                                   | Temp<br>(°C) | <sup>40</sup> Ar/ <sup>39</sup> Ar | <sup>37</sup> Ar/ <sup>39</sup> Ar | <sup>36</sup> Ar/ <sup>39</sup> Ar<br>(x 10 <sup>-3</sup> ) | <sup>39</sup> Ar <sub>K</sub><br>(x 10 <sup>-15</sup> mol) | K/Ca  | <sup>40</sup> Ar*<br>(%) | <sup>39</sup> Ar<br>(%) | Age<br>(Ma) | ±1σ<br>(Ma) | Time<br>(min) |
|------------------------------------------------------------------------------------------------------|--------------|------------------------------------|------------------------------------|-------------------------------------------------------------|------------------------------------------------------------|-------|--------------------------|-------------------------|-------------|-------------|---------------|
| KGB-99-16 C:11:107, Biotite, 0.71 mg, J=0.0160956±0.10%, D=1.0024±0.001, NM-107, Lab#=50309-01       |              |                                    |                                    |                                                             |                                                            |       |                          |                         |             |             |               |
| x B                                                                                                  | 720          | 29.14                              | 0.0488                             | 36.51                                                       | 3.26                                                       | 10.5  | 63.0                     | 1.2                     | 466.6       | 6.6         |               |
| x D                                                                                                  | 850          | 73.46                              | -0.0154                            | 4.870                                                       | 1.381                                                      | -     | 98.0                     | 1.6                     | 1388.3      | 6.0         |               |
| E                                                                                                    | 900          | 74.27                              | 0.0022                             | 0.2209                                                      | 29.7                                                       | 232.3 | 99.9                     | 12.2                    | 1417.6      | 2.6         |               |
| F                                                                                                    | 950          | 74.56                              | 0.0059                             | 0.4484                                                      | 37.7                                                       | 87.2  | 99.8                     | 25.6                    | 1420.5      | 2.3         |               |
| G                                                                                                    | 1000         | 74.78                              | 0.0061                             | 0.4048                                                      | 29.9                                                       | 83.8  | 99.8                     | 36.2                    | 1423.5      | 1.9         |               |
| H                                                                                                    | 1050         | 74.62                              | 0.0062                             | 0.2281                                                      | 13.53                                                      | 82.5  | 99.9                     | 41.1                    | 1422.2      | 1.8         |               |
| I                                                                                                    | 1100         | 75.09                              | 0.0185                             | 0.2643                                                      | 29.7                                                       | 27.5  | 99.9                     | 51.6                    | 1428.2      | 1.6         |               |
| J                                                                                                    | 1200         | 74.82                              | 0.0323                             | 0.3906                                                      | 34.8                                                       | 15.8  | 99.9                     | 64.0                    | 1424.2      | 1.9         |               |
| K                                                                                                    | 1300         | 74.63                              | 0.1150                             | 0.2314                                                      | 80.1                                                       | 4.4   | 99.9                     | 92.5                    | 1422.4      | 2.6         |               |
| x L                                                                                                  | 1650         | 78.42                              | 0.0296                             | 19.14                                                       | 21.23                                                      | 17.3  | 92.8                     | 100.0                   | 1398.4      | 2.4         |               |
| Integrated age ± 1σ                                                                                  |              |                                    | n=10                               |                                                             | 281.4                                                      | 11.8  | K2O=9.46%                |                         | 1412.0      | 1.6         |               |
| Plateau ± 1σ                                                                                         |              |                                    | steps E-K                          | n=7                                                         | MSWD=2.75                                                  | 255.5 |                          | 90.8                    | 1423.6      | 1.6         |               |
| KGB-99-16 C:10:107, K-feldspar, 2.05 mg, J=0.0160442±0.10%, D=1.00644±0.00091, NM-107, Lab#=50308-01 |              |                                    |                                    |                                                             |                                                            |       |                          |                         |             |             |               |
| x A                                                                                                  | 450          | 358.3                              | 0.1005                             | 59.01                                                       | 1.220                                                      | 5.1   | 95.1                     | 0.1                     | 3368.4      | 9.6         | 25.0          |
| x B                                                                                                  | 450          | 83.47                              | 0.2923                             | 85.66                                                       | 0.307                                                      | 1.7   | 69.7                     | 0.1                     | 1189        | 26          | 25.0          |
| x C                                                                                                  | 500          | 61.64                              | 0.4270                             | 15.59                                                       | 0.835                                                      | 1.2   | 92.6                     | 0.2                     | 1172        | 11          | 14.6          |
| x D                                                                                                  | 500          | 55.09                              | 0.4229                             | 36.00                                                       | 1.034                                                      | 1.2   | 80.7                     | 0.3                     | 971.6       | 9.5         | 24.7          |
| x E                                                                                                  | 550          | 55.75                              | 0.1006                             | 7.707                                                       | 3.25                                                       | 5.1   | 95.9                     | 0.6                     | 1117.3      | 3.8         | 15.2          |
| x F                                                                                                  | 550          | 49.36                              | 0.1813                             | 13.76                                                       | 3.15                                                       | 2.8   | 91.8                     | 0.9                     | 985.2       | 4.0         | 25.2          |
| x G                                                                                                  | 600          | 49.56                              | 0.1135                             | 3.606                                                       | 7.50                                                       | 4.5   | 97.9                     | 1.6                     | 1038.0      | 3.0         | 14.9          |
| x H                                                                                                  | 600          | 46.54                              | 0.0941                             | 2.875                                                       | 7.14                                                       | 5.4   | 98.2                     | 2.2                     | 991.8       | 2.0         | 24.6          |
| x I                                                                                                  | 650          | 51.10                              | 0.0416                             | 0.6870                                                      | 13.69                                                      | 12.3  | 99.6                     | 3.5                     | 1076.6      | 1.6         | 15.4          |
| x J                                                                                                  | 650          | 48.63                              | 0.0604                             | 1.667                                                       | 11.88                                                      | 8.4   | 99.0                     | 4.6                     | 1032.1      | 1.7         | 25.4          |
| x K                                                                                                  | 700          | 51.55                              | 0.1116                             | 0.6794                                                      | 14.21                                                      | 4.6   | 99.6                     | 5.9                     | 1084.0      | 1.7         | 15.2          |
| x L                                                                                                  | 700          | 51.42                              | 0.0471                             | 2.341                                                       | 9.37                                                       | 10.8  | 98.7                     | 6.7                     | 1073.9      | 1.6         | 25.3          |
| x M                                                                                                  | 750          | 55.76                              | 0.0732                             | 1.150                                                       | 10.91                                                      | 7.0   | 99.4                     | 7.7                     | 1147.3      | 1.8         | 15.0          |
| x N                                                                                                  | 750          | 56.68                              | 0.0939                             | 2.798                                                       | 7.65                                                       | 5.4   | 98.6                     | 8.4                     | 1154.0      | 2.1         | 25.2          |
| x O                                                                                                  | 800          | 60.60                              | 0.1415                             | -0.0805                                                     | 5.86                                                       | 3.6   | 100.1                    | 8.9                     | 1225.4      | 2.0         | 6.9           |
| x P                                                                                                  | 850          | 63.77                              | 0.0811                             | 0.0564                                                      | 11.74                                                      | 6.3   | 100.0                    | 10.0                    | 1270.8      | 1.9         | 7.3           |
| x Q                                                                                                  | 900          | 68.11                              | 0.0597                             | -0.1378                                                     | 19.50                                                      | 8.5   | 100.1                    | 11.8                    | 1332.5      | 1.7         | 7.2           |
| R                                                                                                    | 950          | 69.45                              | 0.0307                             | 0.0562                                                      | 27.8                                                       | 16.6  | 100.0                    | 14.3                    | 1350.2      | 1.6         | 7.4           |
| S                                                                                                    | 1000         | 69.48                              | 0.0734                             | 0.3973                                                      | 36.0                                                       | 7.0   | 99.8                     | 17.6                    | 1349.3      | 1.6         | 7.2           |
| T                                                                                                    | 1050         | 69.73                              | 0.0272                             | 0.2569                                                      | 54.0                                                       | 18.8  | 99.9                     | 22.5                    | 1353.2      | 1.8         | 7.4           |
| U                                                                                                    | 1100         | 68.42                              | 0.0447                             | 0.1691                                                      | 101.1                                                      | 11.4  | 99.9                     | 31.8                    | 1335.6      | 2.6         | 7.3           |
| V                                                                                                    | 1100         | 68.73                              | 0.0342                             | 0.3480                                                      | 209.8                                                      | 14.9  | 99.9                     | 50.9                    | 1339.1      | 2.7         | 25.2          |
| W                                                                                                    | 1100         | 69.40                              | 0.0283                             | 0.3836                                                      | 276.3                                                      | 18.0  | 99.8                     | 76.1                    | 1348.2      | 3.7         | 59.9          |
| X                                                                                                    | 1100         | 68.86                              | 0.0214                             | 1.024                                                       | 123.5                                                      | 23.9  | 99.6                     | 87.4                    | 1338.2      | 2.5         | 121.8         |
| Y                                                                                                    | 1100         | 69.80                              | 0.0217                             | 3.943                                                       | 69.1                                                       | 23.5  | 98.3                     | 93.7                    | 1339.2      | 2.0         | 237.3         |
| Z                                                                                                    | 1100         | 73.44                              | 0.0375                             | 14.40                                                       | 37.7                                                       | 13.6  | 94.2                     | 97.1                    | 1346.8      | 2.2         | 486.8         |
| x ZA                                                                                                 | 1200         | 67.55                              | 0.0999                             | -0.3251                                                     | 4.55                                                       | 5.1   | 100.2                    | 97.5                    | 1325.7      | 2.5         | 7.3           |
| x ZB                                                                                                 | 1300         | 67.49                              | 0.0487                             | 0.5548                                                      | 11.98                                                      | 10.5  | 99.8                     | 98.6                    | 1321.1      | 1.9         | 7.9           |
| x ZC                                                                                                 | 1400         | 63.33                              | 0.0874                             | 0.6815                                                      | 13.72                                                      | 5.8   | 99.7                     | 99.9                    | 1261.8      | 1.7         | 8.0           |
| x ZD                                                                                                 | 1500         | 74.58                              | 0.4779                             | 7.200                                                       | 1.433                                                      | 1.1   | 97.2                     | 100.0                   | 1391.9      | 6.4         | 7.9           |
| x ZE                                                                                                 | 1700         | 178.9                              | 1.288                              | 248.2                                                       | 0.151                                                      | 0.40  | 59.1                     | 100.0                   | 1790        | 52          | 7.4           |
| Integrated age ± 1σ                                                                                  |              |                                    | n=31                               |                                                             | 1096.4                                                     | 12.6  | K2O=12.80%               |                         | 1323.9      | 1.7         |               |
| Plateau ± 1σ                                                                                         |              |                                    | steps R-Z                          | n=9                                                         | MSWD=8.67                                                  | 935.3 |                          | 85.3                    | 1346.0      | 2.3         |               |

| ID                                                                                                  | Temp<br>(°C) | $^{40}\text{Ar}/^{39}\text{Ar}$ | $^{37}\text{Ar}/^{39}\text{Ar}$ | $^{36}\text{Ar}/^{39}\text{Ar}$<br>( $\times 10^{-3}$ ) | $^{39}\text{Ar}_K$<br>( $\times 10^{-15}$ mol) | K/Ca  | $^{40}\text{Ar}^*$<br>(%) | $^{39}\text{Ar}$<br>(%) | Age<br>(Ma) | $\pm 1\sigma$<br>(Ma) | Time<br>(min) |
|-----------------------------------------------------------------------------------------------------|--------------|---------------------------------|---------------------------------|---------------------------------------------------------|------------------------------------------------|-------|---------------------------|-------------------------|-------------|-----------------------|---------------|
| <b>KGB-99-25</b> #2:107, 1.10 mg muscovite, J=0.0165±0.10%, D=1.0052±0.00121, NM-107, Lab#=50346-01 |              |                                 |                                 |                                                         |                                                |       |                           |                         |             |                       |               |
| x A                                                                                                 | 600          | 93.08                           | 0.0010                          | 112.8                                                   | 0.612                                          | 510.2 | 64.2                      | 0.1                     | 1238        | 10                    |               |
| B                                                                                                   | 650          | 69.51                           | 0.0010                          | 6.609                                                   | 0.569                                          | 510.2 | 97.2                      | 0.3                     | 1350.6      | 6.2                   |               |
| C                                                                                                   | 700          | 70.67                           | 0.0010                          | 10.81                                                   | 1.062                                          | 510.2 | 95.5                      | 0.5                     | 1349.6      | 4.7                   |               |
| D                                                                                                   | 750          | 70.87                           | 0.0010                          | 11.60                                                   | 3.51                                           | 510.2 | 95.2                      | 1.3                     | 1349.1      | 2.5                   |               |
| E                                                                                                   | 800          | 70.71                           | 0.0010                          | 12.37                                                   | 9.99                                           | 510.2 | 94.8                      | 3.5                     | 1343.6      | 2.1                   |               |
| F                                                                                                   | 840          | 67.47                           | 0.0010                          | 0.8971                                                  | 96.2                                           | 510.2 | 99.6                      | 24.9                    | 1345.8      | 2.1                   |               |
| G                                                                                                   | 880          | 67.29                           | 0.0010                          | 0.1754                                                  | 114.3                                          | 510.2 | 99.9                      | 50.3                    | 1346.2      | 2.6                   |               |
| H                                                                                                   | 920          | 67.20                           | 0.0010                          | 0.1781                                                  | 67.6                                           | 510.2 | 99.9                      | 65.4                    | 1344.9      | 2.7                   |               |
| I                                                                                                   | 960          | 67.63                           | 0.0010                          | 0.5019                                                  | 29.3                                           | 510.2 | 99.8                      | 71.9                    | 1349.6      | 2.0                   |               |
| J                                                                                                   | 1000         | 67.42                           | 0.0010                          | 1.068                                                   | 14.59                                          | 510.2 | 99.5                      | 75.1                    | 1344.3      | 2.0                   |               |
| K                                                                                                   | 1040         | 67.40                           | 0.0010                          | 0.7438                                                  | 15.6                                           | 510.2 | 99.7                      | 78.6                    | 1345.4      | 2.5                   |               |
| L                                                                                                   | 1080         | 67.72                           | 0.0010                          | 0.6318                                                  | 17.3                                           | 510.2 | 99.7                      | 82.5                    | 1350.3      | 2.2                   |               |
| M                                                                                                   | 1120         | 67.60                           | 0.0010                          | 0.3929                                                  | 30.6                                           | 510.2 | 99.8                      | 89.3                    | 1349.7      | 2.2                   |               |
| N                                                                                                   | 1160         | 67.29                           | 0.0010                          | 0.1312                                                  | 40.8                                           | 510.2 | 99.9                      | 98.3                    | 1346.3      | 3.3                   |               |
| O                                                                                                   | 1200         | 67.65                           | 0.0010                          | 0.4904                                                  | 4.12                                           | 510.2 | 99.8                      | 99.2                    | 1349.9      | 2.6                   |               |
| P                                                                                                   | 1250         | 67.88                           | 0.0010                          | 1.213                                                   | 1.56                                           | 510.2 | 99.5                      | 99.6                    | 1350.2      | 4.0                   |               |
| Q                                                                                                   | 1350         | 67.08                           | 0.0010                          | 1.731                                                   | 0.445                                          | 510.2 | 99.2                      | 99.7                    | 1336.7      | 9.9                   |               |
| x R                                                                                                 | 1650         | 68.81                           | 0.0010                          | 2.837                                                   | 1.412                                          | 510.2 | 98.8                      | 100.0                   | 1356.5      | 3.9                   |               |
| <b>Integrated age <math>\pm 1\sigma</math></b>                                                      |              |                                 | n=18                            |                                                         | 449.6                                          | 510.2 | K2O=9.52%                 |                         | 1346.4      | 1.7                   |               |
| <b>Plateau <math>\pm 1\sigma</math></b>                                                             |              | steps B-Q                       | n=16                            | MSWD=1.06                                               | 447.6                                          |       |                           | 99.5                    | 1347.2      | 1.1                   |               |

| ID                                                                                                | Temp<br>(°C) | <sup>40</sup> Ar/ <sup>39</sup> Ar | <sup>37</sup> Ar/ <sup>39</sup> Ar | <sup>36</sup> Ar/ <sup>39</sup> Ar<br>(x 10 <sup>-3</sup> ) | <sup>39</sup> Ar <sub>K</sub><br>(x 10 <sup>-15</sup> mol) | K/Ca  | <sup>40</sup> Ar*<br>(%) | <sup>39</sup> Ar<br>(%) | Age<br>(Ma) | ±1σ<br>(Ma) | Time<br>(min) |
|---------------------------------------------------------------------------------------------------|--------------|------------------------------------|------------------------------------|-------------------------------------------------------------|------------------------------------------------------------|-------|--------------------------|-------------------------|-------------|-------------|---------------|
| KGB-99-27 D:7:107, K-feldspar, 1.87 mg, J=0.0160662±0.10%, D=1.0024±0.001, NM-107, Lab#=#50314-01 |              |                                    |                                    |                                                             |                                                            |       |                          |                         |             |             |               |
| x A                                                                                               | 450          | 182.7                              | 0.0100                             | 30.07                                                       | 1.86                                                       | 50.9  | 95.1                     | 0.2                     | 2405.1      | 5.5         | 18.7          |
| x B                                                                                               | 450          | 21.52                              | 0.0033                             | 10.25                                                       | 0.696                                                      | 156.1 | 85.9                     | 0.3                     | 468.6       | 7.0         | 24.7          |
| x C                                                                                               | 500          | 13.43                              | 0.0072                             | 4.152                                                       | 1.487                                                      | 70.8  | 90.9                     | 0.4                     | 322.4       | 4.0         | 14.3          |
| x D                                                                                               | 500          | 10.49                              | 0.0060                             | 2.559                                                       | 1.452                                                      | 84.5  | 92.8                     | 0.6                     | 261.5       | 3.7         | 24.4          |
| x E                                                                                               | 550          | 5.783                              | 0.0034                             | 1.223                                                       | 3.34                                                       | 148.2 | 93.7                     | 0.9                     | 150.0       | 1.9         | 14.9          |
| x F                                                                                               | 550          | 3.579                              | 0.0008                             | 1.454                                                       | 3.86                                                       | 656.2 | 87.9                     | 1.3                     | 88.3        | 1.5         | 25.0          |
| x G                                                                                               | 600          | 3.145                              | 0.0031                             | 0.8358                                                      | 8.44                                                       | 165.3 | 92.1                     | 2.2                     | 81.35       | 0.80        | 14.7          |
| x H                                                                                               | 600          | 1.454                              | 0.0021                             | 0.5801                                                      | 7.62                                                       | 240.7 | 88.0                     | 2.9                     | 36.03       | 0.70        | 24.8          |
| x I                                                                                               | 650          | 4.299                              | 0.0032                             | 0.9231                                                      | 14.56                                                      | 158.0 | 93.6                     | 4.4                     | 112.35      | 0.52        | 15.1          |
| x J                                                                                               | 650          | 1.493                              | 0.0035                             | 0.3371                                                      | 11.89                                                      | 147.5 | 93.2                     | 5.6                     | 39.18       | 0.46        | 25.1          |
| x K                                                                                               | 700          | 3.365                              | 0.0043                             | 0.3151                                                      | 19.4                                                       | 118.5 | 97.2                     | 7.6                     | 91.69       | 0.38        | 15.0          |
| x L                                                                                               | 700          | 2.630                              | 0.0050                             | 0.3357                                                      | 17.3                                                       | 101.1 | 96.2                     | 9.4                     | 71.16       | 0.44        | 25.0          |
| x M                                                                                               | 750          | 3.662                              | 0.0058                             | 0.1873                                                      | 24.3                                                       | 88.2  | 98.5                     | 11.9                    | 100.88      | 0.29        | 15.5          |
| x N                                                                                               | 750          | 4.800                              | 0.0063                             | 0.1418                                                      | 21.8                                                       | 81.0  | 99.1                     | 14.1                    | 132.17      | 0.34        | 25.6          |
| x O                                                                                               | 800          | 7.347                              | 0.0080                             | 0.1944                                                      | 10.92                                                      | 63.8  | 99.2                     | 15.2                    | 199.10      | 0.68        | 3.4           |
| x P                                                                                               | 850          | 11.03                              | 0.0109                             | 0.3344                                                      | 25.7                                                       | 46.6  | 99.1                     | 17.8                    | 291.26      | 0.44        | 3.6           |
| x Q                                                                                               | 900          | 15.43                              | 0.0110                             | 0.1046                                                      | 41.5                                                       | 46.4  | 99.8                     | 22.0                    | 398.26      | 0.59        | 3.5           |
| x R                                                                                               | 950          | 20.20                              | 0.0093                             | 0.1647                                                      | 54.5                                                       | 54.6  | 99.8                     | 27.6                    | 505.45      | 0.82        | 3.4           |
| x S                                                                                               | 1000         | 24.91                              | 0.0066                             | 0.1611                                                      | 65.3                                                       | 77.3  | 99.8                     | 34.3                    | 605.70      | 0.95        | 3.3           |
| x T                                                                                               | 1050         | 27.64                              | 0.0050                             | 0.1698                                                      | 84.0                                                       | 102.9 | 99.8                     | 42.8                    | 661.48      | 0.93        | 3.4           |
| x U                                                                                               | 1100         | 30.07                              | 0.0052                             | 0.1356                                                      | 107.2                                                      | 98.1  | 99.9                     | 53.8                    | 709.7       | 1.1         | 3.5           |
| x V                                                                                               | 1100         | 32.37                              | 0.0049                             | 0.1809                                                      | 210.7                                                      | 103.2 | 99.8                     | 75.3                    | 753.9       | 1.3         | 25.4          |
| x W                                                                                               | 1100         | 37.10                              | 0.0039                             | 0.2509                                                      | 101.5                                                      | 131.4 | 99.8                     | 85.6                    | 841.5       | 1.5         | 54.7          |
| x X                                                                                               | 1100         | 39.55                              | 0.0023                             | 0.3333                                                      | 63.1                                                       | 217.7 | 99.8                     | 92.1                    | 885.1       | 1.3         | 114.7         |
| x Y                                                                                               | 1100         | 40.96                              | 0.0020                             | 0.7779                                                      | 38.3                                                       | 254.4 | 99.4                     | 96.0                    | 907.7       | 1.5         | 234.7         |
| x Z                                                                                               | 1100         | 43.81                              | 0.0022                             | 3.032                                                       | 20.5                                                       | 230.8 | 98.0                     | 98.0                    | 945.6       | 1.4         | 474.7         |
| x ZA                                                                                              | 1250         | 36.13                              | 0.0005                             | 0.3672                                                      | 7.61                                                       | 1108  | 99.7                     | 98.8                    | 823.4       | 1.4         | 3.4           |
| x ZB                                                                                              | 1300         | 37.67                              | -0.0001                            | 0.3006                                                      | 5.34                                                       | -     | 99.8                     | 99.4                    | 851.7       | 1.4         | 3.7           |
| x ZC                                                                                              | 1400         | 50.15                              | 0.0029                             | 1.548                                                       | 2.88                                                       | 177.1 | 99.1                     | 99.7                    | 1058.4      | 2.3         | 3.9           |
| x ZD                                                                                              | 1700         | 60.51                              | 0.0035                             | 11.90                                                       | 3.34                                                       | 146.4 | 94.2                     | 100.0                   | 1172.3      | 2.8         | 3.6           |
| Integrated age ± 1σ                                                                               |              |                                    | n=30                               |                                                             | 980.3                                                      | 98.0  | K2O=12.53%               |                         | 647.33      | 0.84        |               |
| Plateau ± 1σ no plateau                                                                           |              |                                    |                                    |                                                             |                                                            |       |                          |                         |             |             |               |
| KGB-99-27 D:5:107, Biotite, 0.71 mg, J=0.0161481±0.10%, D=1.0024±0.001, NM-107, Lab#=#50313-01    |              |                                    |                                    |                                                             |                                                            |       |                          |                         |             |             |               |
| x A                                                                                               | 650          | 38.88                              | 0.0222                             | 73.49                                                       | 16.5                                                       | 22.9  | 44.1                     | 7.5                     | 440.9       | 3.2         |               |
| x B                                                                                               | 720          | 43.28                              | 0.0153                             | 7.097                                                       | 17.4                                                       | 33.3  | 95.2                     | 15.3                    | 919.4       | 1.5         |               |
| x C                                                                                               | 800          | 52.72                              | 0.0119                             | 2.284                                                       | 13.61                                                      | 42.9  | 98.7                     | 21.5                    | 1100.3      | 1.4         |               |
| x D                                                                                               | 850          | 57.77                              | 0.0095                             | 0.7202                                                      | 28.7                                                       | 53.8  | 99.6                     | 34.5                    | 1185.4      | 1.3         |               |
| x E                                                                                               | 900          | 60.68                              | 0.0094                             | 0.4954                                                      | 23.9                                                       | 54.3  | 99.8                     | 45.4                    | 1229.9      | 1.5         |               |
| x F                                                                                               | 950          | 62.21                              | 0.0118                             | 0.3773                                                      | 19.2                                                       | 43.2  | 99.8                     | 54.0                    | 1252.8      | 1.5         |               |
| x G                                                                                               | 1000         | 62.01                              | 0.0150                             | 0.3910                                                      | 16.5                                                       | 34.1  | 99.8                     | 61.5                    | 1249.7      | 1.5         |               |
| x H                                                                                               | 1050         | 61.47                              | 0.0117                             | 0.3636                                                      | 18.8                                                       | 43.7  | 99.8                     | 70.1                    | 1242.0      | 1.6         |               |
| x I                                                                                               | 1100         | 61.42                              | 0.0111                             | 0.3953                                                      | 22.0                                                       | 46.1  | 99.8                     | 80.0                    | 1241.1      | 1.6         |               |
| x J                                                                                               | 1200         | 60.07                              | 0.0144                             | 0.9324                                                      | 22.9                                                       | 35.5  | 99.6                     | 90.4                    | 1218.9      | 1.5         |               |
| x K                                                                                               | 1300         | 63.27                              | 0.2130                             | 0.9918                                                      | 21.2                                                       | 2.4   | 99.6                     | 100.0                   | 1265.8      | 1.6         |               |
| Integrated age ± 1σ                                                                               |              |                                    | n=11                               |                                                             | 220.7                                                      | 15.9  | K2O=7.39%                |                         | 1152.6      | 1.3         |               |
| Plateau ± 1σ no plateau                                                                           |              |                                    |                                    |                                                             |                                                            |       |                          |                         |             |             |               |

| ID                                                                                                                   | Temp<br>(°C) | $^{40}\text{Ar}/^{39}\text{Ar}$ | $^{37}\text{Ar}/^{39}\text{Ar}$ | $^{36}\text{Ar}/^{39}\text{Ar}$<br>( $\times 10^{-3}$ ) | $^{39}\text{Ar}_K$<br>( $\times 10^{-15}$ mol) | K/Ca  | $^{40}\text{Ar}^*$<br>(%) | $^{39}\text{Ar}$<br>(%) | Age<br>(Ma) | $\pm 1\sigma$<br>(Ma) | Time<br>(min) |
|----------------------------------------------------------------------------------------------------------------------|--------------|---------------------------------|---------------------------------|---------------------------------------------------------|------------------------------------------------|-------|---------------------------|-------------------------|-------------|-----------------------|---------------|
| <b>KGB9932A D:10:104</b> , K-feldspar, 1.34 mg, J=0.0032888 $\pm$ 0.10%, D=1.0024 $\pm$ 0.001, NM-104, Lab#=50206-01 |              |                                 |                                 |                                                         |                                                |       |                           |                         |             |                       |               |
| x A                                                                                                                  | 450          | 27.12                           | 0.0043                          | 53.29                                                   | 2.80                                           | 118.2 | 41.9                      | 1.5                     | 66.11       | 0.84                  | 14.5          |
| x B                                                                                                                  | 450          | 10.22                           | -0.0018                         | 25.17                                                   | 0.85                                           | -     | 27.0                      | 2.0                     | 16.3        | 1.2                   | 23.1          |
| x C                                                                                                                  | 500          | 7.116                           | -0.0033                         | 14.46                                                   | 1.42                                           | -     | 39.7                      | 2.7                     | 16.65       | 0.61                  | 13.7          |
| x D                                                                                                                  | 500          | 12.29                           | -0.0014                         | 34.75                                                   | 1.14                                           | -     | 16.2                      | 3.3                     | 11.78       | 0.94                  | 24.1          |
| x E                                                                                                                  | 550          | 8.847                           | -0.0028                         | 21.44                                                   | 1.57                                           | -     | 28.2                      | 4.2                     | 14.69       | 0.75                  | 13.7          |
| x F                                                                                                                  | 550          | 15.23                           | -0.0011                         | 44.20                                                   | 1.24                                           | -     | 14.1                      | 4.9                     | 12.7        | 1.0                   | 23.9          |
| x G                                                                                                                  | 600          | 10.70                           | 0.0002                          | 27.46                                                   | 1.64                                           | 2863  | 24.0                      | 5.7                     | 15.15       | 0.77                  | 14.2          |
| x H                                                                                                                  | 600          | 19.05                           | 0.0004                          | 60.86                                                   | 1.22                                           | 1188  | 5.5                       | 6.4                     | 6.2         | 1.2                   | 24.1          |
| x I                                                                                                                  | 650          | 16.43                           | -0.0013                         | 45.62                                                   | 1.40                                           | -     | 17.8                      | 7.2                     | 17.3        | 1.0                   | 14.0          |
| x J                                                                                                                  | 650          | 25.51                           | 0.0004                          | 78.98                                                   | 1.08                                           | 1180  | 8.4                       | 7.7                     | 12.7        | 1.9                   | 23.9          |
| x K                                                                                                                  | 700          | 14.66                           | -0.0005                         | 40.92                                                   | 1.77                                           | -     | 17.4                      | 8.7                     | 15.03       | 0.84                  | 14.6          |
| x L                                                                                                                  | 700          | 24.80                           | -0.0049                         | 78.69                                                   | 1.28                                           | -     | 6.2                       | 9.4                     | 9.0         | 1.5                   | 24.9          |
| x M                                                                                                                  | 750          | 16.42                           | -0.0036                         | 48.64                                                   | 1.51                                           | -     | 12.3                      | 10.2                    | 12.0        | 1.3                   | 14.6          |
| x N                                                                                                                  | 750          | 24.49                           | 0.0001                          | 76.15                                                   | 1.49                                           | 4335  | 8.0                       | 11.0                    | 11.6        | 1.6                   | 24.8          |
| x O                                                                                                                  | 800          | 17.90                           | -0.0081                         | 54.43                                                   | 0.712                                          | -     | 10.0                      | 11.4                    | 10.6        | 1.4                   | 4.7           |
| x P                                                                                                                  | 850          | 10.04                           | -0.0023                         | 26.10                                                   | 1.73                                           | -     | 23.0                      | 12.3                    | 13.58       | 0.76                  | 4.7           |
| x Q                                                                                                                  | 900          | 3.471                           | 0.0011                          | 1.689                                                   | 2.04                                           | 470.2 | 85.5                      | 13.4                    | 17.41       | 0.32                  | 3.5           |
| x R                                                                                                                  | 950          | 3.783                           | -0.0004                         | 1.687                                                   | 3.34                                           | -     | 86.7                      | 15.2                    | 19.24       | 0.21                  | 4.2           |
| x S                                                                                                                  | 1000         | 4.380                           | 0.0020                          | 2.018                                                   | 4.39                                           | 255.7 | 86.3                      | 17.6                    | 22.16       | 0.18                  | 4.8           |
| x T                                                                                                                  | 1050         | 5.333                           | 0.0002                          | 2.824                                                   | 2.10                                           | 3219  | 84.3                      | 18.7                    | 26.35       | 0.38                  | 4.3           |
| x U                                                                                                                  | 1100         | 6.596                           | 0.0033                          | 3.730                                                   | 6.46                                           | 154.9 | 83.2                      | 22.2                    | 32.16       | 0.17                  | 5.0           |
| x V                                                                                                                  | 1100         | 6.848                           | 0.0040                          | 3.148                                                   | 20.7                                           | 126.8 | 86.4                      | 33.4                    | 34.63       | 0.13                  | 24.9          |
| x W                                                                                                                  | 1100         | 6.237                           | 0.0016                          | 2.504                                                   | 33.6                                           | 311.3 | 88.1                      | 51.5                    | 32.179      | 0.092                 | 54.5          |
| x X                                                                                                                  | 1100         | 5.941                           | 0.0009                          | 2.341                                                   | 50.3                                           | 552.8 | 88.3                      | 78.7                    | 30.737      | 0.074                 | 114.4         |
| x Y                                                                                                                  | 1100         | 6.126                           | 0.0008                          | 2.579                                                   | 27.0                                           | 647.1 | 87.5                      | 93.3                    | 31.401      | 0.100                 | 166.8         |
| x Z                                                                                                                  | 1100         | 7.726                           | 0.0010                          | 8.332                                                   | 12.3                                           | 522.4 | 68.0                      | 99.9                    | 30.82       | 0.17                  | 474.0         |
| x ZD                                                                                                                 | 1400         | 10.97                           | -0.0240                         | 11.70                                                   | 0.204                                          | -     | 68.4                      | 100.0                   | 43.9        | 3.1                   | 5.5           |
| <b>Integrated age <math>\pm 1\sigma</math></b>                                                                       |              | n=27                            |                                 |                                                         | 185.4                                          | 428.8 | K2O=16.16%                |                         | 29.64       | 0.10                  |               |

Plateau  $\pm 1\sigma$  no plateau

|                                                                                                                                 |      |       |         |        |       |       |           |       |       |      |  |
|---------------------------------------------------------------------------------------------------------------------------------|------|-------|---------|--------|-------|-------|-----------|-------|-------|------|--|
| <b>KGB9932a G:1:104</b> , muscovite, 3 1mm flakes, 0.6 mg, J=0.0032588 $\pm$ 0.10%, D=1.0024 $\pm$ 0.001, NM-104, Lab#=50215-01 |      |       |         |        |       |       |           |       |       |      |  |
| x AA                                                                                                                            | 700  | 65.87 | -0.0588 | 200.8  | 0.116 | -     | 9.9       | 0.3   | 37.9  | 7.5  |  |
| x B                                                                                                                             | 800  | 25.17 | 0.0454  | 51.71  | 0.525 | 11.2  | 39.2      | 1.5   | 57.1  | 2.0  |  |
| x C                                                                                                                             | 900  | 17.49 | -0.0016 | 23.40  | 2.78  | -     | 60.4      | 8.1   | 60.98 | 0.62 |  |
| x D                                                                                                                             | 950  | 14.64 | 0.0007  | 9.808  | 3.52  | 688.6 | 80.2      | 16.4  | 67.58 | 0.39 |  |
| x E                                                                                                                             | 1000 | 12.32 | 0.0007  | 1.964  | 12.8  | 774.6 | 95.3      | 46.5  | 67.59 | 0.14 |  |
| x F                                                                                                                             | 1050 | 12.20 | 0.0046  | 2.847  | 2.79  | 109.7 | 93.1      | 53.1  | 65.43 | 0.30 |  |
| x G                                                                                                                             | 1100 | 12.82 | 0.0000  | 3.990  | 2.44  | 10286 | 90.8      | 58.9  | 67.01 | 0.31 |  |
| x H                                                                                                                             | 1150 | 12.69 | 0.0006  | 3.136  | 4.87  | 837.4 | 92.7      | 70.4  | 67.70 | 0.20 |  |
| x I                                                                                                                             | 1200 | 12.15 | 0.0001  | 0.9410 | 10.4  | 4248  | 97.7      | 94.8  | 68.34 | 0.13 |  |
| x J                                                                                                                             | 1250 | 12.75 | -0.0035 | 2.091  | 1.46  | -     | 95.1      | 98.2  | 69.79 | 0.41 |  |
| x K                                                                                                                             | 1300 | 15.71 | -0.0195 | 8.724  | 0.199 | -     | 83.6      | 98.7  | 75.5  | 2.0  |  |
| x L                                                                                                                             | 1700 | 16.36 | -0.0040 | 14.07  | 0.549 | -     | 74.5      | 100.0 | 70.2  | 1.3  |  |
| <b>Integrated age <math>\pm 1\sigma</math></b>                                                                                  |      | n=12  |         |        | 42.4  | 727.5 | K2O=8.32% |       | 67.11 | 0.15 |  |

Plateau  $\pm 1\sigma$  no plateau

| ID | Temp<br>(°C) | $^{40}\text{Ar}/^{39}\text{Ar}$ | $^{37}\text{Ar}/^{39}\text{Ar}$ | $^{36}\text{Ar}/^{39}\text{Ar}$<br>( $\times 10^{-3}$ ) | $^{39}\text{Ar}_K$<br>( $\times 10^{-15}$ mol) | K/Ca | $^{40}\text{Ar}^*$<br>(%) | $^{39}\text{Ar}$<br>(%) | Age<br>(Ma) | $\pm 1\sigma$<br>(Ma) | Time<br>(min) |
|----|--------------|---------------------------------|---------------------------------|---------------------------------------------------------|------------------------------------------------|------|---------------------------|-------------------------|-------------|-----------------------|---------------|
|----|--------------|---------------------------------|---------------------------------|---------------------------------------------------------|------------------------------------------------|------|---------------------------|-------------------------|-------------|-----------------------|---------------|

**KGB9932a D:11:104**, biotite, 10 flakes, about 0.2 mm, 1.5 mg, J=0.0032895 $\pm$ 0.10%, D=1.0024 $\pm$ 0.001, NM-104, Lab#=50207-01

|                                                |      |           |        |            |        |                     |           |       |       |      |  |
|------------------------------------------------|------|-----------|--------|------------|--------|---------------------|-----------|-------|-------|------|--|
| A                                              | 700  | 19.24     | 0.0271 | 36.97      | 4.67   | 18.8                | 43.2      | 5.7   | 48.54 | 0.51 |  |
| B                                              | 800  | 8.540     | 0.0090 | 2.356      | 16.1   | 56.5                | 91.8      | 25.3  | 45.82 | 0.12 |  |
| C                                              | 900  | 8.770     | 0.0022 | 1.452      | 15.1   | 226.8               | 95.1      | 43.7  | 48.69 | 0.11 |  |
| D                                              | 950  | 8.933     | 0.0044 | 2.157      | 4.78   | 115.5               | 92.8      | 49.6  | 48.43 | 0.19 |  |
| E                                              | 1000 | 9.071     | 0.0048 | 3.928      | 3.72   | 105.5               | 87.2      | 54.1  | 46.20 | 0.27 |  |
| F                                              | 1050 | 8.787     | 0.0044 | 3.396      | 5.85   | 115.6               | 88.6      | 61.2  | 45.47 | 0.25 |  |
| G                                              | 1100 | 8.733     | 0.0020 | 1.704      | 13.5   | 261.5               | 94.2      | 77.7  | 48.05 | 0.10 |  |
| H                                              | 1150 | 8.938     | 0.0022 | 1.632      | 8.1    | 227.8               | 94.6      | 87.6  | 49.35 | 0.15 |  |
| I                                              | 1200 | 9.106     | 0.0017 | 2.140      | 3.88   | 306.7               | 93.0      | 92.3  | 49.46 | 0.25 |  |
| J                                              | 1250 | 9.218     | 0.0018 | 1.494      | 3.79   | 290.7               | 95.2      | 97.0  | 51.21 | 0.23 |  |
| K                                              | 1300 | 9.721     | 0.0035 | 2.147      | 1.61   | 144.4               | 93.5      | 98.9  | 52.99 | 0.41 |  |
| L                                              | 1700 | 17.96     | 0.0031 | 31.75      | 0.89   | 162.8               | 47.7      | 100.0 | 50.1  | 1.1  |  |
| <b>Integrated age <math>\pm 1\sigma</math></b> |      |           | n=12   |            | 82.0   | 95.8                | K2O=6.38% |       | 47.97 | 0.11 |  |
| <b>Plateau <math>\pm 1\sigma</math></b>        |      | steps A-L | n=12   | MSWD=89.38 | 81.998 | 171.880 $\pm$ 92.80 | 100.0     |       | 48.08 | 0.48 |  |

**KGB-99-34 E:1:107**, K-feldspar, 1.92 mg, J=0.016 $\pm$ 0.10%, D=1.0024 $\pm$ 0.001, NM-107, Lab#=50318-01

|                                  |      |       |         |        |       |      |            |       |        |      |       |
|----------------------------------|------|-------|---------|--------|-------|------|------------|-------|--------|------|-------|
| x A                              | 450  | 898.7 | 0.0573  | 46.52  | 0.720 | 8.9  | 98.5       | 0.1   | 4905   | 14   | 18.6  |
| x B                              | 450  | 109.8 | -0.0255 | 19.76  | 0.270 | -    | 94.7       | 0.1   | 1767   | 16   | 24.6  |
| x C                              | 500  | 70.39 | 0.0079  | 7.904  | 0.593 | 64.3 | 96.7       | 0.2   | 1328.6 | 8.1  | 14.3  |
| x D                              | 500  | 97.46 | 0.0230  | 5.975  | 0.565 | 22.2 | 98.2       | 0.2   | 1675.1 | 9.1  | 24.4  |
| x E                              | 550  | 54.02 | 0.0211  | 4.941  | 1.323 | 24.2 | 97.3       | 0.4   | 1100.7 | 3.9  | 14.9  |
| x F                              | 550  | 7.805 | 0.0106  | 0.9939 | 1.079 | 47.9 | 96.2       | 0.5   | 204.1  | 4.3  | 25.0  |
| x G                              | 600  | 14.26 | 0.0183  | 1.258  | 2.77  | 27.9 | 97.4       | 0.8   | 361.3  | 2.3  | 14.6  |
| x H                              | 600  | 2.243 | 0.0210  | 1.570  | 2.57  | 24.3 | 79.1       | 1.0   | 49.9   | 2.0  | 24.8  |
| x I                              | 650  | 24.20 | 0.0197  | 1.181  | 6.96  | 25.8 | 98.6       | 1.7   | 582.6  | 1.3  | 15.1  |
| x J                              | 650  | 2.231 | 0.0164  | 0.7011 | 4.47  | 31.1 | 90.7       | 2.2   | 56.8   | 1.3  | 25.1  |
| x K                              | 700  | 8.723 | 0.0229  | 0.4934 | 10.70 | 22.2 | 98.3       | 3.3   | 231.35 | 0.70 | 14.9  |
| x L                              | 700  | 2.573 | 0.0199  | 0.2765 | 8.57  | 25.6 | 96.9       | 4.2   | 69.80  | 0.72 | 25.0  |
| x M                              | 750  | 8.172 | 0.0253  | 0.5671 | 17.1  | 20.2 | 98.0       | 6.0   | 216.77 | 0.49 | 15.5  |
| x N                              | 750  | 2.996 | 0.0269  | 0.4130 | 13.12 | 19.0 | 96.0       | 7.3   | 80.42  | 0.51 | 25.5  |
| x O                              | 800  | 13.25 | 0.0310  | 0.8395 | 6.43  | 16.5 | 98.1       | 8.0   | 340.5  | 1.0  | 3.7   |
| x P                              | 850  | 10.61 | 0.0310  | 0.2700 | 12.18 | 16.4 | 99.3       | 9.2   | 280.34 | 0.60 | 4.0   |
| x Q                              | 900  | 22.29 | 0.0312  | 0.5868 | 15.7  | 16.4 | 99.2       | 10.9  | 546.12 | 0.77 | 4.1   |
| x R                              | 950  | 37.37 | 0.0231  | 0.5452 | 15.6  | 22.1 | 99.6       | 12.5  | 842.2  | 1.0  | 3.5   |
| x S                              | 1000 | 45.83 | 0.0165  | 0.8096 | 18.7  | 30.9 | 99.5       | 14.4  | 987.8  | 1.2  | 3.4   |
| x T                              | 1050 | 43.97 | 0.0139  | 0.6118 | 26.3  | 36.7 | 99.6       | 17.1  | 957.5  | 1.3  | 3.5   |
| x U                              | 1100 | 52.91 | 0.0120  | 0.8659 | 24.9  | 42.4 | 99.5       | 19.7  | 1102.1 | 1.5  | 3.3   |
| x V                              | 1100 | 31.68 | 0.0114  | 0.6106 | 80.0  | 44.7 | 99.4       | 27.9  | 735.9  | 1.0  | 25.3  |
| x W                              | 1100 | 25.62 | 0.0086  | 0.4152 | 100.6 | 59.6 | 99.5       | 38.3  | 616.80 | 0.90 | 54.8  |
| x X                              | 1100 | 24.04 | 0.0086  | 0.4333 | 128.5 | 59.2 | 99.5       | 51.6  | 583.82 | 0.88 | 114.8 |
| x Y                              | 1100 | 22.21 | 0.0070  | 0.5209 | 125.6 | 73.1 | 99.3       | 64.6  | 544.76 | 0.64 | 234.8 |
| x Z                              | 1100 | 25.49 | 0.0067  | 0.9177 | 63.4  | 76.0 | 98.9       | 71.1  | 610.9  | 1.1  | 325.8 |
| x ZA                             | 1250 | 20.76 | 0.0075  | 0.4345 | 66.7  | 68.4 | 99.4       | 78.0  | 513.96 | 0.98 | 3.9   |
| x ZB                             | 1300 | 18.75 | 0.0070  | 0.4475 | 75.9  | 72.8 | 99.3       | 85.8  | 469.8  | 1.1  | 3.7   |
| x ZC                             | 1400 | 22.19 | 0.0057  | 0.5724 | 53.2  | 89.0 | 99.2       | 91.3  | 544.03 | 0.92 | 4.2   |
| x ZD                             | 1700 | 21.94 | 0.0070  | 0.7669 | 84.2  | 72.5 | 99.0       | 100.0 | 537.34 | 0.97 | 3.5   |
| Integrated age $\pm 1\sigma$     |      |       | n=30    |        | 968.7 | 48.8 | K2O=12.11% |       | 604.27 | 0.77 |       |
| Plateau $\pm 1\sigma$ no plateau |      |       |         |        |       |      |            |       |        |      |       |

| ID | Temp<br>(°C) | $^{40}\text{Ar}/^{39}\text{Ar}$ | $^{37}\text{Ar}/^{39}\text{Ar}$ | $^{36}\text{Ar}/^{39}\text{Ar}$<br>( $\times 10^{-3}$ ) | $^{39}\text{Ar}_K$<br>( $\times 10^{-15}$ mol) | K/Ca | $^{40}\text{Ar}^*$<br>(%) | $^{39}\text{Ar}$<br>(%) | Age<br>(Ma) | $\pm 1\sigma$<br>(Ma) | Time<br>(min) |
|----|--------------|---------------------------------|---------------------------------|---------------------------------------------------------|------------------------------------------------|------|---------------------------|-------------------------|-------------|-----------------------|---------------|
|----|--------------|---------------------------------|---------------------------------|---------------------------------------------------------|------------------------------------------------|------|---------------------------|-------------------------|-------------|-----------------------|---------------|

**KGB-99-34 E:2:107**, Hornblende, 2.80 mg, J=0.01628 $\pm$ 0.10%, D=1.0024 $\pm$ 0.001, NM-107, Lab#=50319-01

|                                                |      |           |        |            |         |      |           |       |         |       |  |
|------------------------------------------------|------|-----------|--------|------------|---------|------|-----------|-------|---------|-------|--|
| x A                                            | 800  | 71.95     | 1.197  | 64.56      | 1.469   | 0.43 | 73.6      | 1.1   | 1122.2  | 8.0   |  |
| x B                                            | 900  | 45.27     | 0.8519 | 26.18      | 0.766   | 0.60 | 83.1      | 1.7   | 861.7   | 9.6   |  |
| x C                                            | 950  | 40.42     | 1.146  | 5.478      | 0.530   | 0.45 | 96.2      | 2.1   | 885.3   | 13.7  |  |
| x D                                            | 1000 | 54.32     | 1.881  | 4.881      | 1.391   | 0.27 | 97.7      | 3.1   | 1123.8  | 5.6   |  |
| x E                                            | 1050 | 62.70     | 2.671  | 1.943      | 3.30    | 0.19 | 99.5      | 5.6   | 1265.6  | 3.0   |  |
| x F                                            | 1080 | 68.12     | 3.155  | 2.590      | 5.63    | 0.16 | 99.3      | 9.8   | 1341.1  | 2.4   |  |
| x G                                            | 1100 | 70.02     | 3.458  | 1.353      | 7.53    | 0.15 | 99.9      | 15.5  | 1373.2  | 2.3   |  |
| x H                                            | 1120 | 72.34     | 3.471  | 1.164      | 3.66    | 0.15 | 99.9      | 18.2  | 1405.6  | 2.4   |  |
| I                                              | 1140 | 71.17     | 3.465  | 1.210      | 16.5    | 0.15 | 99.9      | 30.6  | 1389.4  | 2.2   |  |
| J                                              | 1160 | 69.47     | 3.455  | 0.9593     | 31.4    | 0.15 | 100.0     | 54.1  | 1367.1  | 1.9   |  |
| K                                              | 1180 | 69.22     | 3.483  | 1.360      | 16.1    | 0.15 | 99.9      | 66.2  | 1362.2  | 1.9   |  |
| L                                              | 1220 | 69.84     | 3.717  | 1.277      | 38.7    | 0.14 | 99.9      | 95.2  | 1371.5  | 2.5   |  |
| M                                              | 1300 | 72.05     | 4.896  | 4.321      | 6.38    | 0.10 | 98.8      | 100.0 | 1391.4  | 2.1   |  |
| <b>Integrated age <math>\pm 1\sigma</math></b> |      |           | n=13   |            | 133.4   | 0.15 | K2O=1.12% |       | 1360.3  | 1.6   |  |
| <b>Plateau <math>\pm 1\sigma</math></b>        |      | steps I-M | n=5    | MSWD=41.58 | 109.083 |      |           | 81.8  | 1375.43 | 6.142 |  |

**KGB-99-34 E:4:107**, Biotite, 1.19 mg, J=0.01623 $\pm$ 0.10%, D=1.0024 $\pm$ 0.001, NM-107, Lab#=50320-01

|                                                |      |            |        |         |       |       |           |       |        |     |  |
|------------------------------------------------|------|------------|--------|---------|-------|-------|-----------|-------|--------|-----|--|
| x A                                            | 650  | 30.63      | 0.0159 | 53.40   | 1.305 | 32.2  | 48.5      | 0.4   | 389.1  | 9.1 |  |
| x B                                            | 720  | 25.43      | 0.0104 | 14.61   | 4.19  | 49.0  | 83.0      | 1.6   | 531.2  | 2.8 |  |
| x C                                            | 800  | 26.90      | 0.0057 | 4.703   | 15.7  | 88.8  | 94.8      | 6.1   | 624.4  | 1.1 |  |
| x D                                            | 850  | 32.04      | 0.0025 | 1.293   | 35.7  | 200.9 | 98.8      | 16.5  | 747.5  | 1.7 |  |
| x E                                            | 900  | 45.58      | 0.0051 | 0.2408  | 37.8  | 100.0 | 99.9      | 27.4  | 997.5  | 1.5 |  |
| x F                                            | 950  | 57.01      | 0.0048 | 0.0293  | 31.8  | 106.2 | 100.0     | 36.6  | 1181.4 | 2.6 |  |
| x G                                            | 1000 | 56.21      | 0.0055 | 0.1589  | 28.3  | 92.0  | 99.9      | 44.8  | 1168.6 | 1.4 |  |
| x H                                            | 1050 | 52.08      | 0.0060 | -0.0867 | 18.5  | 84.9  | 100.1     | 50.2  | 1105.2 | 1.5 |  |
| x I                                            | 1100 | 45.13      | 0.0138 | 0.2981  | 28.2  | 36.9  | 99.8      | 58.3  | 989.5  | 1.3 |  |
| x J                                            | 1200 | 37.78      | 0.0142 | 0.3570  | 37.8  | 35.9  | 99.7      | 69.3  | 860.4  | 1.3 |  |
| x K                                            | 1300 | 59.99      | 0.0495 | 0.3403  | 73.8  | 10.3  | 99.8      | 90.6  | 1224.9 | 2.3 |  |
| x L                                            | 1650 | 66.01      | 0.0052 | 0.5627  | 32.5  | 97.5  | 99.8      | 100.0 | 1311.1 | 1.8 |  |
| <b>Integrated age <math>\pm 1\sigma</math></b> |      |            | n=12   |         | 345.7 | 31.4  | K2O=6.88% |       | 1057.3 | 1.3 |  |
| <b>Plateau <math>\pm 1\sigma</math></b>        |      | no plateau | n=0    |         |       |       |           |       |        |     |  |

**Notes:**

Isotopic ratios corrected for blank, radioactive decay, and mass discrimination, not corrected for interfering reactions.

Errors quoted for individual analyses include analytical error only, without interfering reaction or J uncertainties.

Integrated age calculated by summing isotopic measurements of all steps.

Integrated age error calculated by quadratically combining errors of isotopic measurements of all steps.

Plateau age is inverse-variance-weighted mean of selected steps.

Plateau age error is inverse-variance-weighted mean error (Taylor, 1982) times root MSWD where MSWD>1.

Plateau error is weighted error of Taylor (1982).

Decay constants and isotopic abundances after Steiger and Jäger (1977).

x preceding sample ID denotes analyses excluded from plateau age calculations.

- No detectable  $^{37}\text{Ar}$ .

Weight percent K<sub>2</sub>O calculated from  $^{39}\text{Ar}$  signal, sample weight, and instrument sensitivity.

Ages calculated relative to FC-2 Fish Canyon Tuff sanidine interlaboratory standard at 27.84 Ma

Decay Constant (LambdaK (total)) = 5.543e-10/a

Correction factors:

NM-104  $(^{39}\text{Ar}/^{37}\text{Ar})_{\text{Ca}} = 0.0007 \pm 5\text{e-}05$   
 $(^{36}\text{Ar}/^{37}\text{Ar})_{\text{Ca}} = 0.00027 \pm 1\text{e-}05$   
 $(^{38}\text{Ar}/^{39}\text{Ar})_K = 0.0125$   
 $(^{40}\text{Ar}/^{39}\text{Ar})_K = 0.025 \pm 0.005$

NM-107  $(^{39}\text{Ar}/^{37}\text{Ar})_{\text{Ca}} = 0.0007 \pm 5\text{e-}05$   
 $(^{36}\text{Ar}/^{37}\text{Ar})_{\text{Ca}} = 0.00027 \pm 1\text{e-}05$   
 $(^{38}\text{Ar}/^{39}\text{Ar})_K = 0.0125$   
 $(^{40}\text{Ar}/^{39}\text{Ar})_K = 0.0275 \pm 0.0004$



## APPENDIX 2

### **$^{40}\text{Ar}/^{39}\text{Ar}$ K-feldspar Thermochronology and Multiple Diffusion Domain (MDD) Theory**

#### Introduction

This overview of  $^{40}\text{Ar}/^{39}\text{Ar}$  K-feldspar thermochronology summarizes the theory and methodology of the Multiple Diffusion Domain (MDD) model with specific examples to illustrate the procedures used at the New Mexico Geochronology Research Laboratory (NMGRL). Geochronology relies on the accumulation of a radiogenic daughter isotope that is produced by the radioactive decay of a parent isotope. The parent to daughter ratio is combined with known decay constant(s) to calculate a date for a sample. The calculated date may be a meaningful geological age (i.e. time of an eruption, growth of a mineral, etc.) provided the sample is a closed system with no gain or loss of the parent or daughter isotopes. Thermochronology is based on the same basic principles of geochronology, but rather than a date being related to a specific event, thermochronological data records the time when a sample passes through a certain temperature (Dodson, 1973). This temperature is defined as the closure temperature and reflects the temperature when the sample effectively ceases to lose a daughter product by diffusion. There are many thermochronometers amongst the variety of radioactive decay schemes and closure temperatures are highly variable (McDougall and Harrison, 1999). For the K-Ar system, hornblende appears to have the highest closure temperature of about 500°C (Harrison, 1981) followed by micas that range between about 300 and 400°C (Robins, 1974; Harrison et al., 1985; Hames and Bowring, 1994; Grove and Harrison, 1996). Homogeneous orthoclase was determined to have a closure temperature of about 300°C (Foland, 1974). Foland (1974) also suggested that microcline would have a lower closure temperature due to fine-scale microtextures. Significant work throughout the past two decades has utilized and explored the argon systematics of K-feldspar (see McDougall and Harrison, 1999 for a review). There are probably many factors that contribute to argon loss in this microstructurally complex mineral and the overall utility of  $^{40}\text{Ar}/^{39}\text{Ar}$  dating is still debated (e.g. Parsons et al., 1999; Lovera et al., 1997; 2002).

For  $^{40}\text{Ar}/^{39}\text{Ar}$  K-feldspar thermochronology at the NMGRL, we adopt the MDD model of Lovera et al. (1989) to extract thermal histories from step-heating data. This method views K-feldspars as having a number of different size diffusion domains each of which has a different closure temperature typically between  $\sim 300$  and  $175^\circ\text{C}$ . Diffusion domains are discrete areas of varying length and are assumed to be separated by boundaries that are maintained at zero argon concentration. Given sufficient time and temperatures near or in excess of the closure temperature of a particular domain, radiogenic argon will diffuse to the domain boundary and escape from the K-feldspar. Because argon loss in K-feldspars occurs in the temperature range equivalent to those found at mid- to shallow crustal levels, K-feldspar  $^{40}\text{Ar}/^{39}\text{Ar}$  thermochronology is an useful method for understanding the thermal history of an important crustal region. In addition, the K-feldspar system is sensitive to moderate thermal perturbations and therefore can be used to determine the timing of episodic argon loss events related to, for instance, magmatism, geothermal activity or burial.

#### K-feldspar $^{40}\text{Ar}/^{39}\text{Ar}$ data and plots

##### Age spectrum diagrams

The thermal history recorded by a K-feldspar can be determined by combining the age spectrum data and the laboratory degassing behavior of  $^{39}\text{Ar}$ . The age spectrum is a measurement of the natural radiogenic  $^{40}\text{Ar}$  ( $^{40}\text{Ar}^*$ ) concentration distribution within the sample, whereas the degassing of the reactor-produced  $^{39}\text{Ar}$  during step-heating is a measure of the K-feldspar closure temperatures. Below we demonstrate the steps used to recover thermal histories from  $^{40}\text{Ar}/^{39}\text{Ar}$  K-feldspar step heating data. The first step is to create the age spectrum by high-resolution ( $\sim 45$  steps) step heating (Fig. 1a). Heating schedules typically begin at  $400^\circ\text{C}$  and include three to four isothermal steps for many of the lower temperature settings (Fig. 1b). The isothermal steps serve two primary purposes. The first is to resolve excess  $^{40}\text{Ar}$  that is common in most K-feldspars. The excess  $^{40}\text{Ar}$  appears to be cited in thermally distinct reservoirs as the first isothermal step commonly records an anomalously old apparent age relative to the next isothermal steps

at a given temperature (Figs 1a, b). When the next higher isothermal temperature group is carried out the 1<sup>st</sup> step is once again anomalously old and is followed by younger apparent ages (Fig. 1b). This behavior is thought to be caused by decrepitation of fluid inclusions that contain excess  $^{40}\text{Ar}$  (Harrison et al., 1993, 1994). After initial decrepitation caused by the first of the isothermal replicate steps, the age typically decreases and then rises more uniformly as the true distribution of  $^{40}\text{Ar}^*$  is less disturbed by the fluid-inclusion hosted excess argon. Moving to the next highest temperature of isothermal replicates causes decrepitation of new fluid inclusions that again causes the apparent age to increase significantly (Fig. 1a, b).

Because MDD theory does not allow for excess argon contamination, the anomalously old steps need correction prior to modeling the age spectrum. Harrison et al. (1993) developed a method to correct for fluid inclusion hosted excess argon through the recognition that the old apparent ages were correlated to CI that is monitored by measuring  $^{38}\text{Ar}_{\text{CI}}$ . Using the Harrison et al. (1993) approach for many of the Precambrian samples analyzed at the NMGRL, yields CI-corrected ages that are negative indicating that the CI cannot all be correlated to excess argon and thus the method of Harrison et al. (1993) is generally not employed. Rather, it is assumed that when the apparent age reaches a minimum for a given set of isothermal heating steps the measured age accurately records the true  $^{40}\text{Ar}^*$  distribution. To correct the anomalously old apparent ages that are given by the 1<sup>st</sup> isothermal step they are decreased to the mean value of the previous and following steps (Fig. 1b, c). This procedure results in a corrected age spectrum that only records an overall increasing spectrum and is the spectrum used for thermal history modeling.

### Arrhenius diagrams

The second purpose of the isothermal steps is to evaluate whether the calculated diffusion coefficients for the initial heating steps on the Arrhenius diagram are approximately the same. An Arrhenius diagram is a plot of inverse temperature ( $1/T$ ) and frequency-factor length scale parameter ( $D/r^2$ ) for each heating step (Fig. 2a). The

frequency-factor length scale ratio is determined from the fraction of  $^{39}\text{Ar}$  released and the duration of each heating step assuming a plane-sheet geometry (eqs. 1 and 2).

$$f = 1 - (8/\pi^2) \exp(-\pi^2 Dt/4r^2) \quad \text{for } 0.45 \leq f \leq 1 \quad \text{eq. 1}$$

$$f = (2/((\pi^{1/2}))(Dt/r^2)^{1/2} \quad \text{for } 0 \leq f \leq 0.60 \quad \text{eq. 2}$$

where  $D$  = diffusion coefficient;  $f$  = fraction  $^{39}\text{Ar}$  released;  $r$  = diffusion half width;  $t$  = time at temperature.

The slope of the Arrhenius data is a function of the activation energy ( $E$ ) of a sample, however with multiple diffusion domains contributing gas to each temperature step the true slope can be difficult to determine. Lovera et al. (1989) demonstrated that the initial heating steps could yield diffusion coefficients with a slope that accurately records the true  $E$  if the gas released is dominated by only one of the diffusion domains. Subequal diffusion coefficients for isothermal replicate heating steps indicates gas release that is dominated by a single domain (Fig. 2b – data segment 1), whereas significant decreases of the diffusion coefficient during replicate temperature steps indicates gas evolution from a mixture of different domain sizes (Fig. 2b – data segment 2). Because up to 4 replicate isothermal steps are typically used for these samples the overall slope of the initial segment of the Arrhenius plot is generally underestimated by linear regression of all of the diffusion coefficients (Fig. 2b – data segment 3). Therefore, we calculate the slope of line segments between the last isothermal step of a temperature group and the 1<sup>st</sup> isothermal step of the next highest temperature group (Fig 2b – data segment 4). The individual line segments that yield similar values are averaged to estimate the  $E$  for each sample. Typically, the first 3 to 5 line segments yield similar slopes that are averaged to estimate the  $E$  of the sample. For an Arrhenius diagram with Y-axis of  $\log(D/r^2)$  and X-axis of  $10000/T$  the  $E$  is given in kcal/mol via equation 3.

$$E = m * 2.303 * 19.87 \quad \text{eq. 3}$$

where  $m$  is slope, 2.303 is a log versus natural log conversion and 19.87 is the gas constant.

Once the  $E$  is determined, a reference Arrhenius law ( $r_0$ ) with this  $E$  is projected through the initial heating steps (Fig. 2a – data segment 5). Another characteristic of the Arrhenius plot is the several isothermal heating steps conducted at 1100°C (Fig. 2a – data segment 6). Typically a K-feldspar is heated at 1100°C for several steps that total about 8 hours to facilitate substantial degassing prior to incongruent melting. Stepping above 1100°C, where the sample begins to degas via melting, is readily recognized on the Arrhenius plot by a calculated diffusion coefficient that is anomalously high relative to the projection of the lower temperature diffusion coefficients (Fig. 2a – data segment 7).

#### Log( $r/r_0$ ) diagrams

Recall, as small diffusion domains are exhausted of argon during initial heating steps, the slope of the Arrhenius data decrease as larger domains begin to contribute more  $^{39}\text{Ar}$ . This, coupled with the fact that each diffusion coefficient datum on the Arrhenius plot is graphically displayed with a symbol of equal size makes it is difficult to visualize the domain distribution of the sample. Also, the Arrhenius plot varies with heating schedule, thus making it a somewhat ineffective in representing the diffusion domain distribution. Therefore, Lovera et al. (1991) devised the log( $r/r_0$ ) plot as an alternative method of portraying the Arrhenius data (Fig. 3). This is a plot of the log of the deviation of the measured data from  $r_0$  versus cumulative % $^{39}\text{Ar}$  released. Dividing the deviation by 2 yields the parameter log( $r/r_0$ ) that represents the change in domain size ( $r$ ) necessary to depart from  $r_0$ . For a single domain sample there would be no variation between  $r_0$  and the measured data and thus the log( $r/r_0$ ) plot would be a horizontal line with value equal to zero. Log( $r/r_0$ ) values increase as the measured frequency factors fall below  $r_0$  on the Arrhenius diagram. A log( $r/r_0$ ) value of 1 indicates a relative increase in diffusion domain size of 10 whereas a value of 2 means a domain size that is 100 times larger than  $r_0$ . For the example given in Fig. 3, the log( $r/r_0$ ) values climb almost immediately from zero indicating that there is very little gas in the smallest diffusion domain and the overall flat

part near a value of 2 indicates that the largest diffusion domain is about 100 times larger than the reference value. The nondiffusive loss of  $^{39}\text{Ar}$  that stems from sample melting is quite apparent on the  $\log(r/r_0)$  plot as noted by a sudden drop of the  $\log(r/r_0)$  value near 75% cumulative % $^{39}\text{Ar}$  released.

### Modeling kinetic parameters and thermal histories

Once the activation energy and the maximum value on the  $\log(r/r_0)$  plot are determined, the domain distribution (i.e. volume fraction, number of domains, relative sizes) can be obtained by modeling the fraction of  $^{39}\text{Ar}$  released relative to the heating schedule (Lovera et al., 1989; 1991). Lovera developed a set of automated routines for modeling both the  $^{39}\text{Ar}$  fraction released and age spectrum data. We generally use these programs in a semi-automated manner by inputting our determined  $E$  and restricting the number of diffusion domains. The programs are modified from routines given in Press et al. (1992) and use a variational method to calculate a nonlinear-square fit approximation of the  $\log(r/r_0)$  and age spectrum diagrams. For the case of the age spectrum modeling, the thermal histories are approximated with the Chebyshev polynomials with the best-fit Chebyshev coefficients being found with the Levenberg-Marquard methods. After the kinetic parameters are determined, the measured age spectrum is forward modeled by inputting thermal histories that yield calculated spectra that match the measured ages. There are two types of thermal histories calculated by the Lovera programs. For monotonic thermal histories, the sample is only allowed to cool from an initially high temperature, whereas for the unconstrained thermal histories the sample is allowed to undergo reheating (Figs. 4, 5a, b). Individual thermal histories are accepted when they yield a model spectrum that meets the fitting criteria relative to the measured spectrum (Quidelleur et al., 1997). The individual models are contoured and displayed in two separate fashions. For the monotonic thermal histories, 90% confidence intervals are calculated for the mean as well as the overall distribution and are shown as black and grey bans, respectively (Fig. 4). For the unconstrained models, bins of time-temperature space are assigned and then the number of thermal histories that pass through an individual bin is calculated. The contour shading represents various percentages of the

number of time-temperature paths that pass through individual bins relative to the total number of solutions. The background region represents a density of acceptable solutions that is less than 2% of the total number of solutions.

## References

- Harrison, T.M., Heizler, M.T., Lovera, O.M., 1993, *In vacuo* crushing experiments and K-feldspar thermochronometry. *Earth. Planet. Sci. Lett.*, 117, 169-180.
- Harrison, T.M., Heizler, M.T., Lovera O.M. and Wenji, C., 1994, A chlorine disinfectant for excess argon. *Earth Planet. Sci. Lett.*, 123, 95-104.
- Lovera, O.M., Richter, F.M., Harrison, T.M., 1989,  $^{40}\text{Ar}/^{39}\text{Ar}$  thermochronology for slowly cooled samples having a distribution of domain sizes: *Journal of Geophysical Research*, v. 94, p. 17,917-17,935.
- Lovera, O.M., Harrison, T.M., Richter, F.M., 1991, Diffusion domains determined by  $^{39}\text{Ar}$  released during step heating, *Journal of Geophysical Research*, v. 96, p. 2057-2069.
- Press, W. H., Teukolsky, S.A., Vetterling, W.T., Flannery, B.P., 1992, *Numerical recipes in FORTRAN: the art of scientific computing*, Cambridge University Press, 2<sup>nd</sup> ed., 963 p.
- Quidelleur, X., Grove, M., Lovera, O.M., Harrison, T.M., Yin, A., 1997, Thermal evolution and slip history of the Renbu Zedong Thrust, southeastern Tibet: *Journal of Geophysical Research*, v. 102, n. B2, p. 2659-2679.

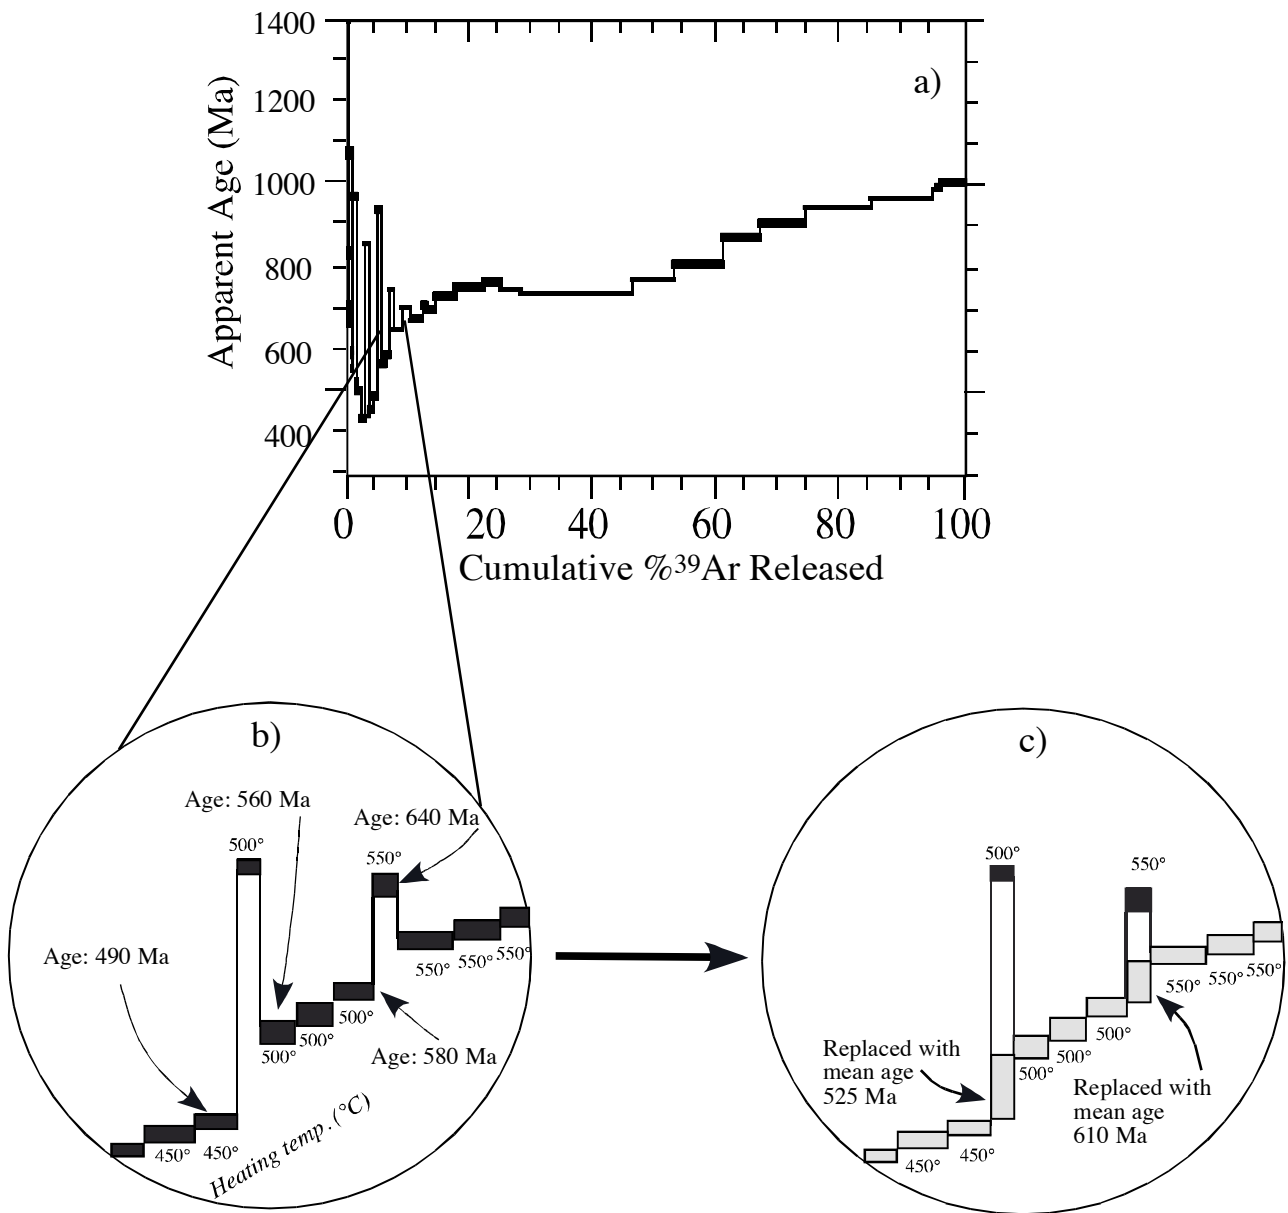

**Fig. 1. Age spectrum diagram and excess argon corrections.** 1a. Common age spectrum for many K-feldspars with initially old ages indicating excess  $^{40}\text{Ar}$  contamination followed by an overall increasing age gradient revealing the non-uniform  $^{40}\text{Ar}^*$  concentration profile developed by argon loss associated with slow-cooling and/or reheating events. 1b. Isothermal replicate heating steps demonstrate a characteristic behavior with the first step yielding an anomalously old age caused by degassing of fluid inclusions that host excess  $^{40}\text{Ar}$ . 1c. Method of correcting anomalous ages involves substituting old ages with the mean age of the preceding and following steps. The error bar is expanded to fill the age space between the preceding and following steps.



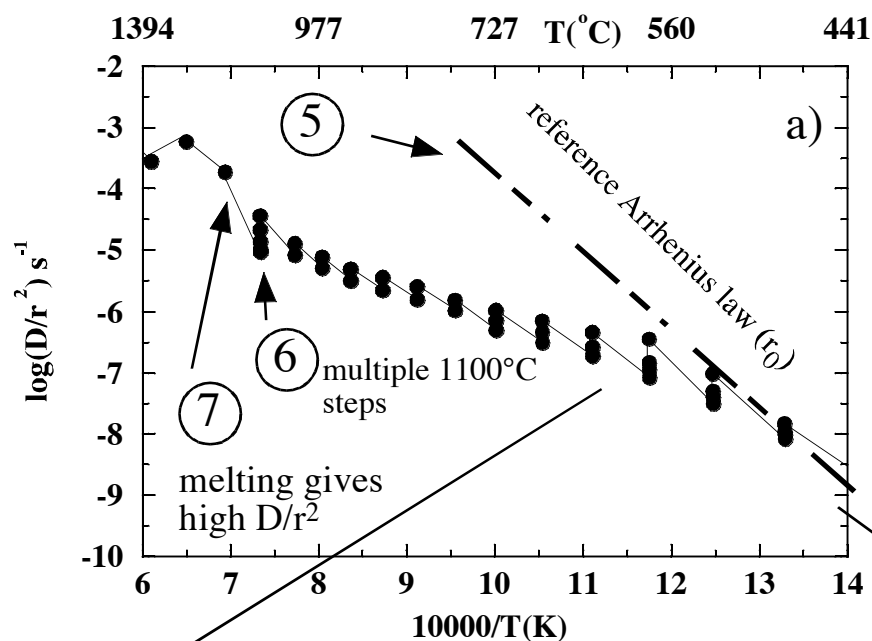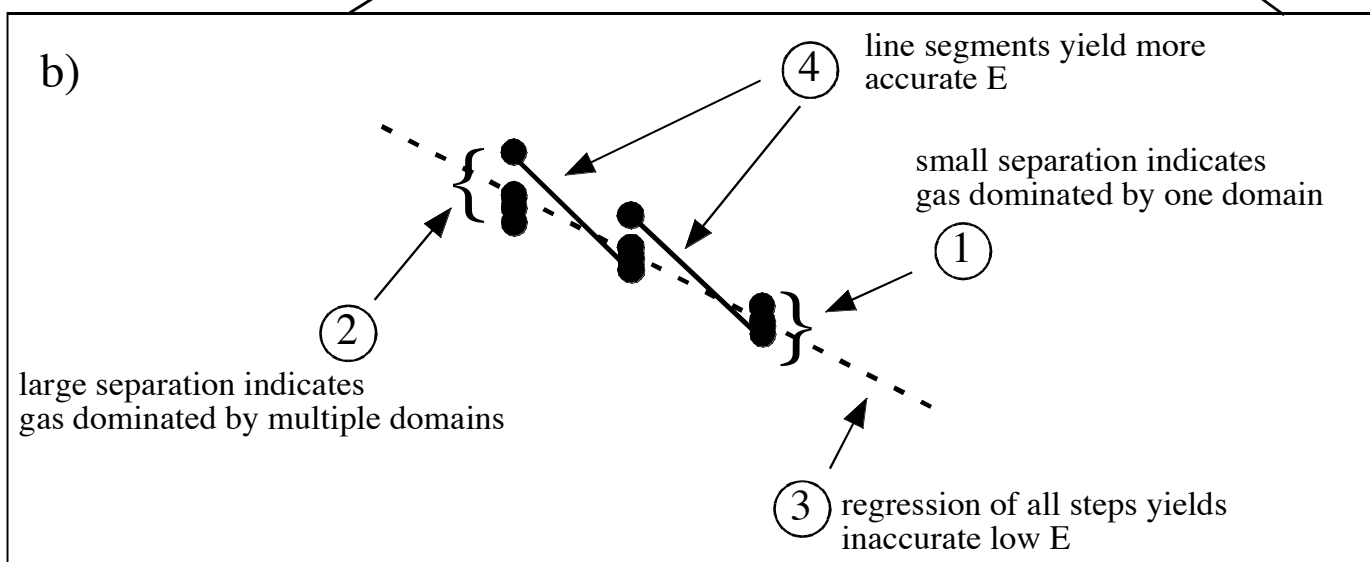

**Fig. 2 Arrhenius diagram.** 1a. Typical K-feldspar Arrhenius diagram for samples containing multiple diffusion domains. 1b. Expansion of initial part of the Arrhenius diagram to demonstrate characteristic data and choice of best  $E$ . 1, when isothermal steps yield similar  $\log(D/r_2)$  values it is inferred that gas released is dominated by a single domain, whereas 2, shows significant decrease of  $\log(D/r_2)$  values for isothermal steps that indicate a transition to degassing of larger diffusion domains. 3, regression of all initial data would provide an  $E$  that is underestimated due to  $^{39}\text{Ar}$  derived from multiple domains. 4, line segments connecting last step of isothermal group with 1<sup>st</sup> step of next highest temperature isothermal group can be used to better determine the slope ( $E$ ) of  $r_0$ . 5, by convention the reference Arrhenius law is projected through initial heating steps such that the initial steps on  $\log(r/r_0)$  are zero. 6, several steps at 1100°C are carried out to degas the sample prior to the onset of melting. 7, once the temperature is raised above 1100°C high apparent  $\log(D/r^2)$  values are calculated due to enhanced argon loss via melting compared to diffusive argon loss. Data collected above 1100°C are not used for modeling since the argon loss from the sample is not occurring by the same mechanism that occurred in nature.

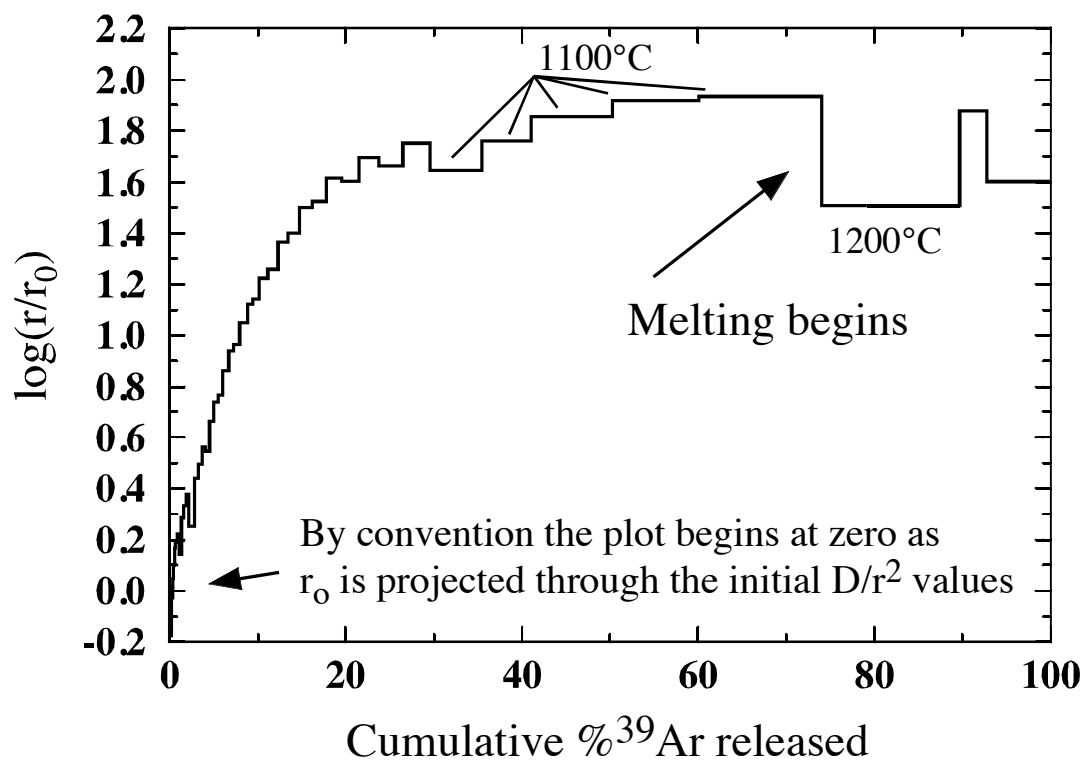

Fig. 3. Log( $r/r_0$ ) diagram. This plot is intended to provide a method to show how much <sup>39</sup>Ar is contained in an individual point on the Arrhenius plot. The log( $r/r_0$ ) value represents the relative domain size compared to  $r_0$  that has caused deviation from the reference Arrhenius law. A value of 1 indicates that  $r$  is 10 times larger than  $r_0$  whereas a value of 2 indicates that  $r$  is 100 times larger than  $r_0$ .

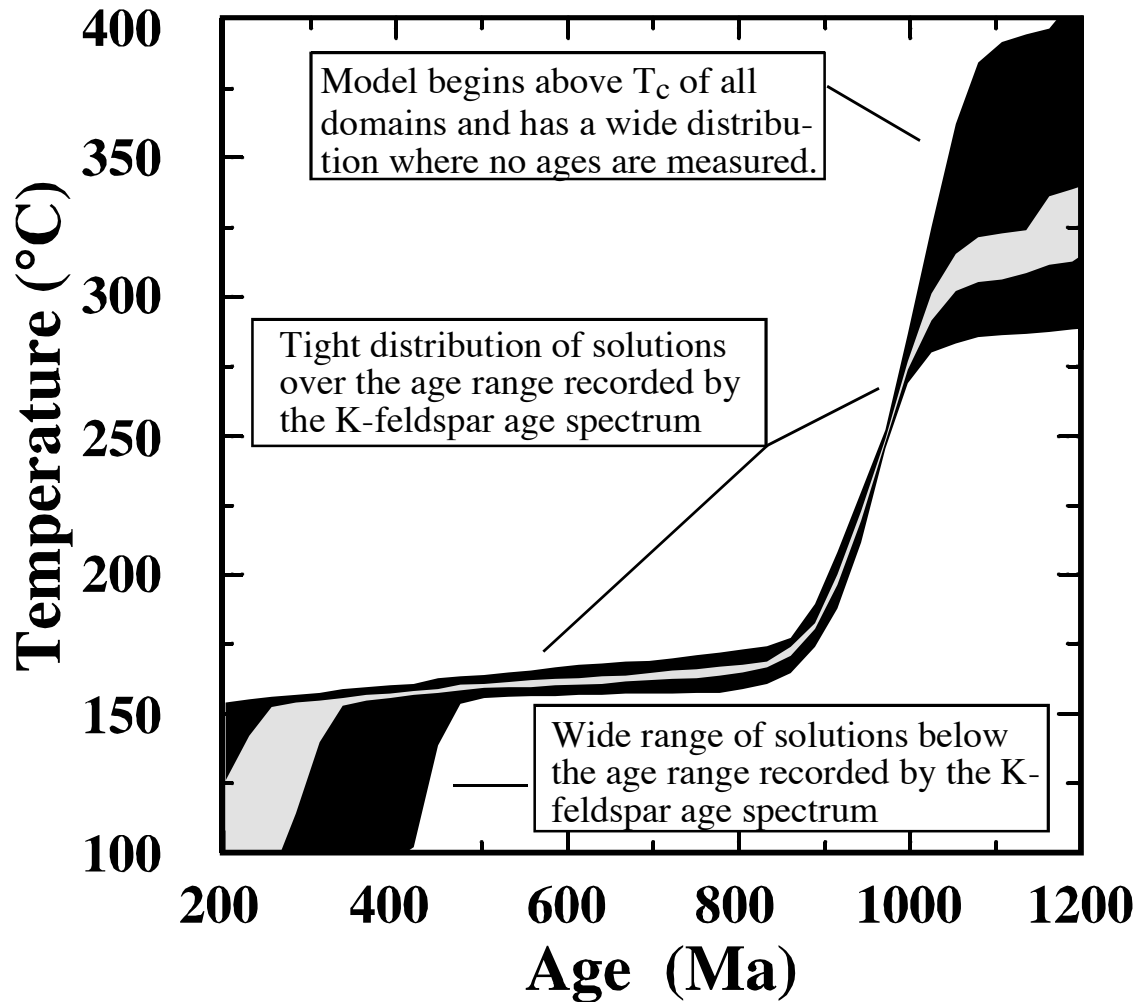

Fig. 4. Thermal histories from monotonic models. Diagram represents contoured results of thermal histories that yield calculated age spectra that match a measured age spectrum. This model only allows the sample to cool from an initially high temperature. The grey band is the 90% confidence interval of the mean, whereas the black band is the 90% confidence of the entire distribution. Large uncertainties in time-temperature space occur where there is either poor agreement between the model and measured data, or more commonly in the age regions that are younger or older than the measured data.

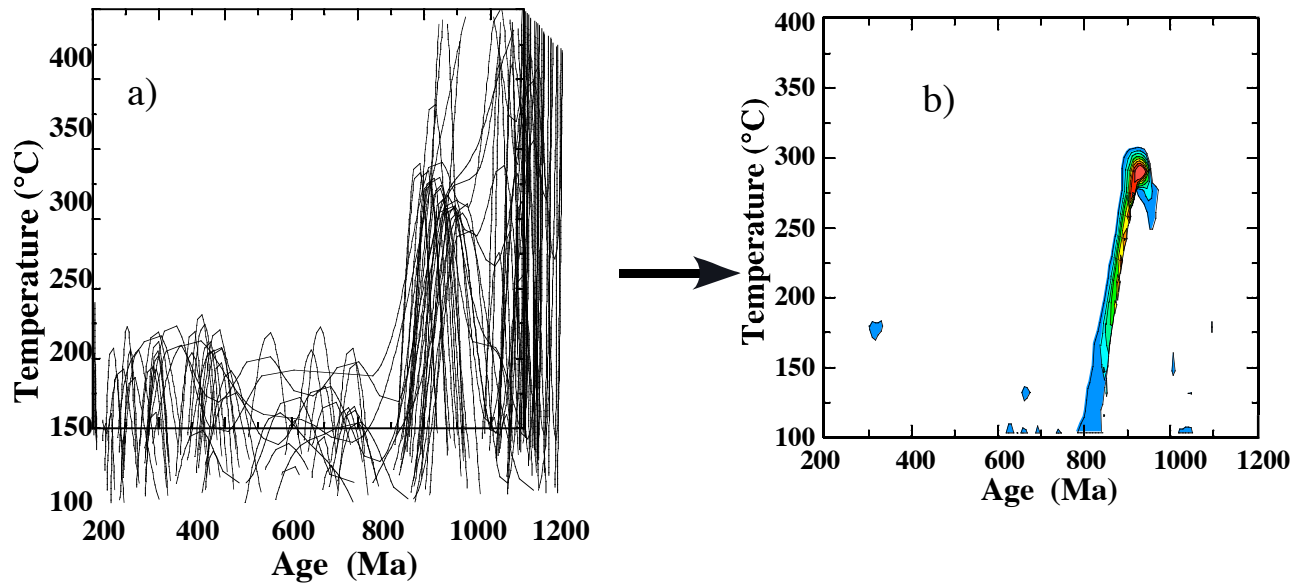

Fig. 5. Thermal histories from unconstrained models. Unconstrained thermal histories incorporate models allowed to accommodate possible reheating events. 5a, Essentially all acceptable models require the sample to be near 275°C at about 950 Ma followed by cooling soon after. Later thermal perturbations cause minor argon loss. 5b, Contoured data of all individual solutions constructed by determining the percentage of solutions that fall within discrete time-temperature bins. Warm colors reflect the highest density of solutions.
